# Supplementary material for: Baleen whale inhalation variability revealed using animal-borne video tags
Source: PeerJ journal article supplement (doi:10.7717/peerj.13724), 2022-07-20

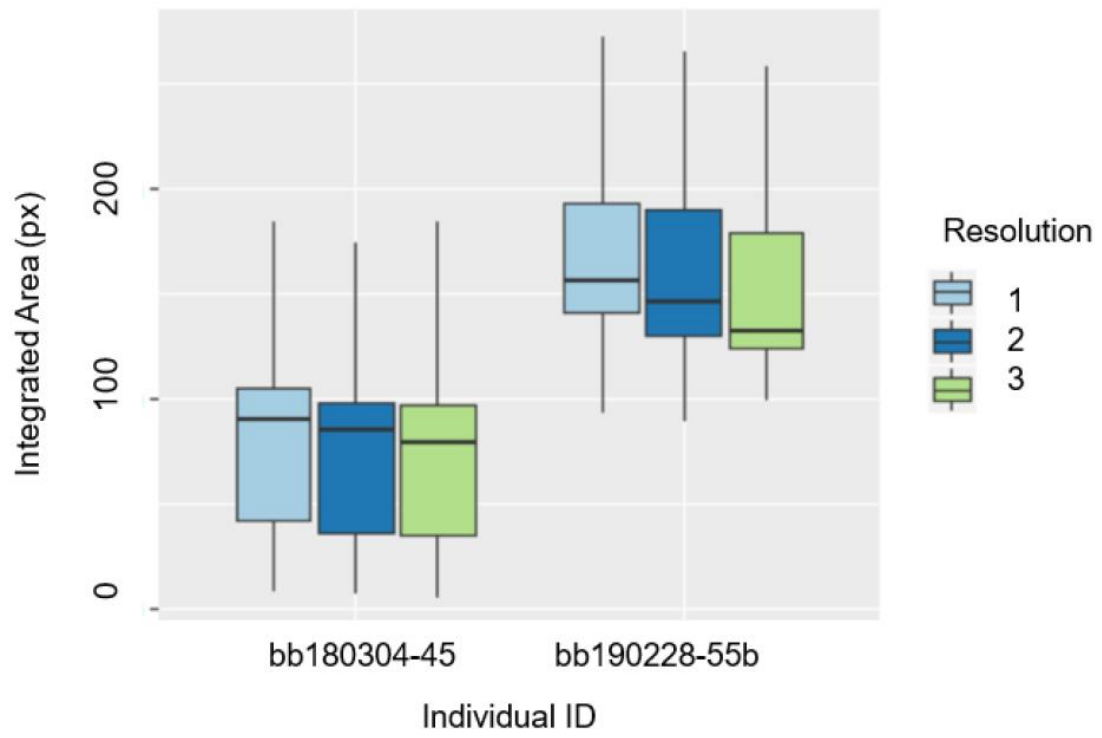

Supplement: Figure_S1.pdf [file Figure_S1.pdf]
