# Supplementary material for: Baleen whale inhalation variability revealed using animal-borne video tags
Source: PeerJ. 2022 Jul 20;10:e13724. doi: 10.7717/peerj.13724 (PMC9308462; doi:10.7717/peerj.13724)
Supplement: Supplemental Information 6 [file peerj-10-13724-s006.csv]

individualID	species	IA	prev_divedur	prev_divedep	following_divedur	follow_divedep	inhaledur	lungenum	max_area
mn180607-44	mn	278.1535	0:05:04	98.4	0:00:10	1.5	0.967	4	416
mn180607-44	mn	NA	0:00:10	1.5	0:00:12	1.6	0.968	0	NA
mn180607-44	mn	585.9165	0:00:12	1.6	0:00:22	4.1	1.067	0	1128
mn180607-44	mn	308.954	0:00:22	4.1	0:00:12	1.6	1.035	0	549
mn180607-44	mn	151.814	0:00:12	1.6	0:00:14	1.7	1.034	0	329
mn180607-44	mn	233.7975	0:00:14	1.7	0:00:15	2	0.934	0	360
mn180607-44	mn	333.096	0:00:15	2	0:00:12	1.6	0.901	0	601
mn180607-44	mn	319.9245	0:00:12	1.6	0:00:11	1.3	1.068	0	541
mn180607-44	mn	195.77	0:00:11	1.3	0:00:12	1.6	0.501	0	290
mn180607-44	mn	921.9845	0:00:12	1.6	0:03:21	100	1.702	2	878
mn180607-44	mn	147.4275	0:03:21	100	0:00:15	2.6	0.934	2	337
mn180607-44	mn	315.3915	0:00:15	2.6	0:00:15	2.3	0.901	0	485
mn180607-44	mn	196.4265	0:00:15	2.3	0:00:13	1.6	0.868	0	363
mn180607-44	mn	415.4845	0:00:13	1.6	0:00:14	1.7	1.168	0	692
mn180607-44	mn	225.891	0:00:14	1.7	0:00:13	1.4	0.834	0	533
mn180607-44	mn	410.243	0:00:13	1.4	0:00:13	1.3	0.901	0	696
mn180607-44	mn	133.786	0:00:13	1.3	0:00:14	1.3	0.968	0	544
mn180607-44	mn	161.6905	0:00:14	1.3	0:00:14	1.5	0.935	0	360
mn180607-44	mn	127.865	0:00:14	1.5	0:00:11	1.2	0.734	0	275
mn180607-44	mn	108.3225	0:00:11	1.2	0:00:14	1.8	0.534	0	332
mn180607-44	mn	602.791	0:00:14	1.8	0:06:48	106.9	2.102	0	783
mn180607-44	mn	135.785	0:06:48	106.9	0:00:15	2.2	0.901	0	268
mn180607-44	mn	236.4615	0:00:15	2.2	0:00:10	1	1.134	0	319
mn180607-44	mn	243.9025	0:00:10	1	0:00:13	1.4	1.135	0	236
mn180607-44	mn	212.149	0:00:13	1.4	0:00:12	1.3	1.001	0	387
mn180607-44	mn	346.9425	0:00:12	1.3	0:00:12	1.3	0.968	0	264
mn180607-44	mn	184.0375	0:00:12	1.3	0:00:22	1.4	1.034	0	260
mn180607-44	mn	164.979	0:00:22	1.4	0:00:14	1.6	0.934	0	290
mn180607-44	mn	218.682	0:00:14	1.6	0:00:17	2.1	0.868	0	439
mn180607-44	mn	159.1845	0:00:17	2.1	0:00:15	1.8	0.934	0	359
mn180607-44	mn	155.307	0:00:15	1.8	0:00:18	2.2	0.801	0	545
mn180607-44	mn	147.1235	0:00:18	2.2	0:00:15	1.6	0.834	0	365
mn180607-44	mn	220.4805	0:00:15	1.6	0:00:15	1.7	1.001	0	327
mn180607-44	mn	148.396	0:00:15	1.7	0:00:18	2	1.035	0	368
mn180607-44	mn	111.598	0:00:18	2	0:00:17	2.1	0.734	0	323
mn180607-44	mn	107.5395	0:00:17	2.1	0:00:18	1.9	0.668	0	282
mn180607-44	mn	834.133	0:00:18	1.9	0:06:25	104.9	1.735	1	778
mn180607-44	mn	140.723	0:06:25	104.9	0:00:15	2	1.001	1	249
mn180607-44	mn	189.524	0:00:15	2	0:00:11	1.3	1.025	0	338
mn180607-44	mn	331.766	0:00:11	1.3	0:00:16	1.6	1.134	0	476
mn180607-44	mn	264.7395	0:00:16	1.6	0:00:36	21.9	1.201	0	422
mn180607-44	mn	644.9705	0:03:54	21.9	0:00:47	21.8	1.401	0	680
mn180607-44	mn	132.908	0:00:47	21.8	0:00:16	1.9	0.901	0	194
mn180607-44	mn	179.9845	0:00:16	1.9	0:00:15	1.4	1.001	0	288
mn180607-44	mn	188.317	0:00:15	1.4	0:00:11	1.4	1.034	0	309
mn180607-44	mn	1108.687	0:00:11	1.4	0:05:43	37.8	1.835	0	761
mn180607-44	mn	199.8145	0:05:43	37.8	0:00:09	1.3	0.901	0	NA
mn180607-44	mn	354.534	0:00:09	1.3	0:00:08	1.1	1.135	0	475
mn180607-44	mn	320.569	0:00:08	1.1	0:00:09	1.4	1.101	0	436
mn180607-44	mn	1562.3225	0:00:09	1.4	0:04:34	103.6	1.969	2	1077
mn180607-44	mn	252.867	0:04:34	103.6	0:00:16	1.5	0.9	2	499
mn180607-44	mn	379.232	0:00:16	1.5	0:00:10	1	0.967	0	575
mn180607-44	mn	329.112	0:00:10	1	0:00:10	1	0.934	0	636
mn180607-44	mn	412.969	0:00:10	1	0:00:10	1	0.968	0	648
mn180607-44	mn	380.905	0:00:10	1	0:00:11	1	1.034	0	673
mn180607-44	mn	282.2515	0:00:11	1	0:00:11	1.4	1.001	0	433
mn180607-44	mn	259.712	0:00:11	1.4	0:00:13	1.3	0.801	0	593
mn180607-44	mn	302.694	0:00:13	1.3	0:00:17	1.5	1.067	0	512
mn180607-44	mn	340.2645	0:00:17	1.5	0:00:18	2.2	0.901	0	691
mn180607-44	mn	228.251	0:00:18	2.2	0:00:20	1.9	0.934	0	414
mn180607-44	mn	1146.647	0:00:20	1.9	0:04:01	76.2	1.535	2	1121
mn180607-44	mn	232.9975	0:03:20	100.7	0:00:13	1.5	0.934	0	409
mn180607-44	mn	665.3255	0:00:13	1.5	0:00:56	13.5	1.425	0	870
mn180607-44	mn	106.5315	0:00:56	13.5	0:00:11	1.6	1.024	0	210
mn180607-44	mn	246.056	0:00:11	1.6	0:00:15	2.5	1.234	0	655
mn180607-44	mn	196.6465	0:00:15	2.5	0:00:10	1.4	0.901	0	407
mn180607-44	mn	489.593	0:00:10	1.4	0:05:24	101.3	1.434	0	515
mn180607-44	mn	NA	0:05:24	101.3	0:00:09	1.5	1.268	2	NA
mn180607-44	mn	488.985	0:00:09	1.5	0:01:03	18.4	1.401	0	613
mn180607-44	mn	179.619	0:01:03	18.4	0:00:13	1.9	0.9	0	366
mn180607-44	mn	810.168	0:00:13	1.9	0:02:56	42.6	1.201	1	1025
mn180607-44	mn	154.5895	0:02:56	42.6	0:00:14	1.8	0.557	1	491
mn180607-44	mn	561.524	0:00:14	1.8	0:01:11	17.3	1.135	0	797
mn180607-44	mn	795.6825	0:01:11	17.3	0:04:23	40.2	1.301	0	920
mn180607-44	mn	309.787	0:04:23	40.2	0:00:11	1.3	0.7	0	288
mn180607-44	mn	NA	0:00:11	1.3	0:00:09	0.6	0.867	0	417
mn180607-44	mn	437.38	0:00:09	0.6	0:00:06	0.5	0.657	0	970
mn180607-44	mn	811.5995	0:00:06	0.5	0:05:21	33	1.258	0	842
mn180607-44	mn	115.5355	0:05:21	33	0:00:11	1.1	0.3	0	NA
mn180607-44	mn	NA	0:00:11	1.1	0:00:09	1.1	0.568	0	NA
mn180607-44	mn	296.5085	0:00:09	1.1	0:00:11	1.1	1.035	0	579
mn180607-44	mn	101.02	0:00:11	1.1	0:00:10	1.1	0.8	0	290
mn180607-44	mn	141.602	0:00:10	1.1	0:00:11	1	0.8	0	595
mn180607-44	mn	NA	0:00:11	1	0:00:14	1.2	0.667	0	NA
mn180607-44	mn	NA	0:00:14	1.2	0:00:12	1.3	0.801	0	NA
mn180607-44	mn	297.543	0:00:12	1.3	0:00:13	1.1	1.001	0	474
mn180607-44	mn	152.686	0:00:13	1.1	0:00:13	1.4	0.901	0	267
mn180607-44	mn	219.1165	0:00:13	1.4	0:00:13	1.6	0.667	0	471
mn180607-44	mn	752.6085	0:00:13	1.6	0:04:51	27.4	1.268	0	868
mn180607-44	mn	258.942	0:04:51	27.4	0:00:11	0.9	0.901	0	480
mn180607-44	mn	244.7895	0:00:11	0.9	0:00:11	0.8	0.901	0	476
mn180607-44	mn	NA	0:00:11	0.8	0:00:11	0.9	0.967	0	NA
mn180607-44	mn	212.5945	0:00:11	0.9	0:00:14	1.6	0.834	0	306
mn180607-44	mn	NA	0:00:14	1.6	0:00:16	1.9	0.7	0	NA
mn180607-44	mn	216.9505	0:00:16	1.9	0:00:15	2	0.901	0	381
mn180607-44	mn	304.879	0:00:15	2	0:05:05	50	1.301	0	NA
mn180607-44	mn	242.783	0:05:05	50	0:00:12	1.7	1.101	0	297
mn180607-44	mn	388.1175	0:00:12	1.7	0:00:09	1.3	1.001	0	584
mn180607-44	mn	331.8145	0:00:09	1.3	0:04:31	70.5	1.301	0	NA
mn180607-44	mn	131.9815	0:04:31	70.5	0:00:12	1.5	0.801	0	321
mn180607-44	mn	175.1615	0:00:12	1.5	0:00:12	0.6	0.634	0	529
mn180607-44	mn	602.2885	0:00:12	0.6	0:00:09	0.9	1.301	0	NA
mn180607-44	mn	NA	0:00:09	0.9	0:00:11	1	0.868	0	NA
mn180607-44	mn	NA	0:00:11	1	0:00:09	1.2	0.9	0	NA
mn180607-44	mn	189.0325	0:00:09	1.2	0:00:11	1.3	0.7	0	516
mn180607-44	mn	267.431	0:00:11	1.3	0:00:12	1.5	0.935	0	478
mn180607-44	mn	298.844	0:00:12	1.5	0:00:14	1.7	1.034	0	486
mn180607-44	mn	398.173	0:00:14	1.7	0:00:10	1.3	0.901	0	680
mn180607-44	mn	1386.419	0:00:10	1.3	0:07:10	45.7	1.902	0	913
mn180607-44	mn	110.159	0:07:10	45.7	0:00:11	1.5	0.767	0	NA
mn180607-44	mn	NA	0:00:11	1.5	0:00:10	1.1	0.867	0	NA
mn180607-44	mn	165.391	0:00:10	1.1	0:00:10	1.1	0.701	0	415
mn180607-44	mn	277.3755	0:00:10	1.1	0:00:12	1.1	0.9	0	501
mn180607-44	mn	162.6155	0:00:12	1.1	0:00:13	1.3	0.834	0	335
mn180607-44	mn	88.3455	0:00:13	1.3	0:00:13	1.3	0.7	0	285
mn180607-44	mn	164.708	0:00:13	1.3	0:00:16	1.8	0.901	0	366
mn180607-44	mn	192.606	0:00:16	1.8	0:00:16	1.7	0.867	0	383
mn180607-44	mn	81.5085	0:00:16	1.7	0:00:16	1.5	0.7	0	197
mn180607-44	mn	204.019	0:00:16	1.5	0:00:17	1.4	1.2	0	455
mn180607-44	mn	838.344	0:00:17	1.4	0:05:58	23	1.435	0	986
mn180607-44	mn	NA	0:05:58	23	0:00:11	1.2	0.801	0	NA
mn180607-44	mn	464.4645	0:00:13	1.5	0:00:13	1.4	0.767	0	712
mn180607-44	mn	77.374	0:00:13	1.4	0:00:13	1.5	0.734	0	186
mn180607-44	mn	371.3345	0:04:46	21.1	0:00:14	1.3	0.667	0	504
mn180607-44	mn	148.59	0:00:14	1.3	0:00:11	0.8	1.034	0	261
mn180607-44	mn	353.0805	0:00:13	1	0:00:14	1.2	0.834	0	481
mn180607-44	mn	102.3125	0:00:14	1.2	0:00:20	2.1	0.801	0	209
mn180607-44	mn	468.072	0:05:41	41	0:00:14	1.4	0.901	0	832
mn180607-44	mn	228.4815	0:00:14	1.4	0:00:13	1.1	0.935	0	376
mn180607-44	mn	752.264	0:00:14	1.4	0:00:15	1.6	0.634	0	NA
mn161117-10	mn	348.266	0:03:55	109.6	0:00:13	19.5	0.875	0	563
mn161117-10	mn	NA	0:00:13	19.5	0:02:53	104.6	1.4	1	NA
mn161117-10	mn	NA	0:02:53	104.6	0:00:18	2.2	0.876	1	NA
mn161117-10	mn	366.853	0:00:18	2.2	0:00:16	1.7	1.167	0	409
mn161117-10	mn	260.9525	0:00:16	1.7	0:00:20	2.6	0.917	0	373
mn161117-10	mn	168.5275	0:00:20	2.6	0:00:15	2	1.084	0	266
mn161117-10	mn	738.36	0:00:15	2	0:05:35	44.3	2.127	0	475
mn161117-10	mn	163.7435	0:05:35	44.3	0:00:13	1.7	0.793	0	287
mn161117-10	mn	618.2655	0:00:13	1.7	0:00:12	1.2	1.168	0	379
mn161117-10	mn	323.312	0:00:12	1.2	0:00:15	1.6	1.168	0	368
mn161117-10	mn	230.7955	0:00:15	1.6	0:00:17	1.6	1.001	0	266
mn161117-10	mn	327.1835	0:00:17	1.6	0:00:19	1.8	1.084	0	386
mn161117-10	mn	333.989	0:00:19	1.8	0:00:20	2.2	1.334	0	335
mn161117-10	mn	346.6925	0:00:20	2.2	0:00:16	2	1.209	0	348
mn161117-10	mn	704.2305	0:00:16	2	0:02:43	44.4	2.086	0	407
mn161117-10	mn	NA	0:02:43	44.4	0:00:25	5.6	1	0	NA
mn161117-10	mn	712.539	0:00:25	5.6	0:07:42	111.2	2.043	0	493
mn161117-10	mn	140.622	0:07:42	111.2	0:00:19	2.4	0.96	0	194
mn161117-10	mn	239.5415	0:00:19	2.4	0:00:18	2	1.1	0	NA
mn161117-10	mn	479.7285	0:00:18	2	0:00:22	2.5	1.209	0	283
mn161117-10	mn	151.824	0:00:22	2.5	0:03:42	19.2	1.793	0	365
mn161117-10	mn	223.6895	0:03:42	19.2	0:00:20	2.6	0.918	0	212
mn161117-10	mn	NA	0:00:20	2.6	0:00:14	1.9	1.043	0	268
mn161117-10	mn	231.5525	0:00:14	1.9	0:05:32	86.4	2.002	2	NA
mn161117-10	mn	159.9025	0:05:32	86.4	0:00:17	2.3	1.335	2	263
mn161117-10	mn	NA	0:00:17	2.3	0:00:14	2.1	0.834	0	299
mn161117-10	mn	520.5965	0:00:14	2.1	0:00:25	3.9	1.084	0	NA
mn161117-10	mn	196.3335	0:00:25	3.9	0:00:13	2.2	1.585	0	476
mn161117-10	mn	NA	0:00:13	2.2	0:04:39	81.9	1.251	0	270
mn161117-10	mn	NA	0:04:39	81.9	0:00:16	2.2	1	0	NA
mn161117-10	mn	407.2295	0:00:16	2.2	0:00:16	1.7	1.168	0	NA
mn161117-10	mn	433.7835	0:00:16	1.7	0:00:11	0.4	1.001	0	559
mn161117-10	mn	117.922	0:00:11	0.4	0:00:18	2.2	1.334	0	429
mn161117-10	mn	362.0525	0:00:18	2.2	0:00:24	2.3	0.917	0	164
mn161117-10	mn	NA	0:00:24	2.3	0:06:52	20.4	1.585	0	320
mn161117-10	mn	NA	0:06:52	20.4	0:00:17	2.3	1.084	0	NA
mn161117-10	mn	NA	0:00:17	2.3	0:00:18	1.7	1	0	NA
mn161117-10	mn	NA	0:00:18	1.7	0:00:20	1.8	1	0	NA
mn161117-10	mn	85.448	0:00:20	1.8	0:00:22	2.2	0.6	0	NA
mn161117-10	mn	96.839	0:00:22	2.2	0:00:20	2	0.917	0	140
mn161117-10	mn	98.5425	0:00:20	2	0:05:25	19.1	1.251	0	133
mn161117-10	mn	NA	0:05:25	19.1	0:00:27	3.4	1.335	0	127
mn161117-10	mn	65.297	0:00:27	3.4	0:00:20	2.3	0.834	0	NA
mn161117-10	mn	74.1325	0:00:20	2.3	0:00:18	2.4	0.751	0	127
mn161117-10	mn	404.614	0:00:18	2.4	0:00:10	1.6	0.918	0	173
mn161117-10	mn	NA	0:00:10	1.6	0:06:31	113.6	2.085	0	317
mn161117-10	mn	NA	0:06:31	113.6	0:00:24	2.8	1	0	NA
mn161117-10	mn	153.129	0:00:24	2.8	0:00:23	2.5	0.8	0	NA
mn161117-10	mn	NA	0:00:23	2.5	0:00:27	2.6	1	0	211
mn161117-10	mn	184.798	0:00:27	2.6	0:01:32	4.8	1	0	NA
mn161117-10	mn	114.2675	0:01:32	4.8	0:00:51	3.8	1.334	0	244
mn161117-10	mn	379.9715	0:00:51	3.8	0:00:37	3.7	1.167	0	167
mn161117-10	mn	NA	0:00:37	3.7	0:03:48	17.6	1.835	0	303
mn161117-10	mn	454.6325	0:03:48	17.6	0:00:15	1.9	1	0	NA
mn161117-10	mn	117.928	0:00:15	1.9	0:05:57	52.2	2.335	0	280
mn161117-10	mn	279.5825	0:05:57	52.2	0:00:19	2	0.876	0	204
mn161117-10	mn	188.4295	0:00:19	2	0:00:22	2	1.084	0	321
mn161117-10	mn	448.7135	0:00:22	2	0:00:18	2.3	1.084	0	204
mn161117-10	mn	126.6855	0:00:18	2.3	0:05:28	109.2	1.585	0	403
mn161117-10	mn	162.888	0:05:28	109.2	0:00:18	2.3	1.001	0	173
mn161117-10	mn	179.415	0:00:18	2.3	0:00:15	1.8	1.084	0	198
mn161117-10	mn	NA	0:00:15	1.8	0:00:24	2.4	1.042	0	312
mn161117-10	mn	278.114	0:00:24	2.4	0:00:22	1.8	1.084	0	NA
mn161117-10	mn	NA	0:00:22	1.8	0:00:27	2.5	1.168	0	333
mn161117-10	mn	NA	0:00:27	2.5	0:05:11	78.6	1.584	3	NA
mn161117-10	mn	62.959	0:05:11	78.6	0:00:18	2.6	0.834	3	165
mn161117-10	mn	233.089	0:00:18	2.6	0:00:17	1.9	1.168	0	297
mn161117-10	mn	NA	0:00:17	1.9	0:00:18	1.7	0.8	0	NA
mn161117-10	mn	NA	0:00:18	1.7	0:00:22	2.3	1	0	NA
mn161117-10	mn	370.961	0:00:22	2.3	0:02:11	15.3	1.751	0	309
mn161117-10	mn	NA	0:02:11	15.3	0:00:23	2.8	0.8	0	NA
mn161117-10	mn	NA	0:00:23	2.8	0:00:14	1.8	1.168	0	NA
mn161117-10	mn	264.577	0:00:14	1.8	0:00:22	2.2	1.334	0	293
mn161117-10	mn	267.797	0:00:22	2.2	0:00:10	1.2	1.418	0	275
mn161117-10	mn	306.332	0:00:10	1.2	0:05:17	98.6	1.918	0	250
mn161117-10	mn	44.389	0:05:17	98.6	0:00:36	4.2	0.501	0	150
mn161117-10	mn	NA	0:00:36	4.2	0:00:23	2.6	1.001	0	NA
mn161117-10	mn	429.2895	0:00:23	2.6	0:00:25	2.2	1.418	0	401
mn161117-10	mn	336.9475	0:00:25	2.2	0:04:40	20.5	1.418	0	292
mn161117-10	mn	147.8735	0:04:40	20.5	0:00:16	1.9	1.084	0	196
mn161117-10	mn	282.309	0:00:16	1.9	0:00:19	2	1.251	0	309
mn161117-10	mn	261.486	0:00:19	2	0:00:24	2.3	1.042	0	317
mn161117-10	mn	276.875	0:00:24	2.3	0:00:25	2.3	1.001	0	236
mn161117-10	mn	NA	0:00:25	2.3	0:06:48	103.9	1.918	0	NA
mn161117-10	mn	68.5825	0:06:48	103.9	0:00:15	1.7	0.668	0	144
mn161117-10	mn	NA	0:00:15	1.7	0:00:15	1.2	0.584	0	NA
mn161117-10	mn	NA	0:00:15	1.2	0:00:16	1.8	1.084	0	NA
mn161117-10	mn	51.436	0:00:16	1.8	0:00:19	1.7	0.584	0	163
mn161117-10	mn	447.187	0:00:19	1.7	0:05:27	76.9	2.169	0	296
mn161117-10	mn	142.7805	0:05:27	76.9	0:00:23	2.7	0.918	0	208
mn161117-10	mn	210.581	0:00:23	2.7	0:00:25	2.7	1.084	0	265
mn161117-10	mn	312.5005	0:00:25	2.7	0:00:21	2.1	1.167	0	338
mn161117-10	mn	506.089	0:00:21	2.1	0:04:07	23	1.751	0	380
mn161117-10	mn	115.368	0:04:07	23	0:00:41	4.9	1.001	0	163
mn161117-10	mn	NA	0:00:41	4.9	0:00:14	1.3	0.417	0	NA
mn161117-10	mn	108.099	0:00:14	1.3	0:00:26	3.3	1.293	0	225
mn161117-10	mn	340.2255	0:00:26	3.3	0:04:51	98	1.584	0	336
mn161117-10	mn	NA	0:04:51	98	0:00:17	2.4	0.834	0	NA
mn161117-10	mn	NA	0:00:17	2.4	0:00:15	1.7	0.834	0	NA
mn161117-10	mn	NA	0:00:15	1.7	0:00:18	1.8	0.751	0	NA
mn161117-10	mn	159.17	0:00:18	1.8	0:00:28	2.6	1.168	0	201
mn161117-10	mn	371.52	0:00:28	2.6	0:01:08	16.8	1.584	0	325
mn161117-10	mn	71.101	0:01:08	16.8	0:00:23	2.3	0.834	0	125
mn161117-10	mn	117.672	0:00:23	2.3	0:00:24	2.8	0.917	0	195
mn161117-10	mn	356.0235	0:00:24	2.8	0:03:41	121.8	1.835	0	353
mn161117-10	mn	NA	0:03:36	113.5	0:00:20	3.1	0.667	1	NA
mn161117-10	mn	119.4385	0:00:20	3.1	0:00:17	2.9	1.167	1	150
mn161117-10	mn	221.0095	0:00:17	2.9	0:00:30	6.3	1.585	0	223
mn161117-10	mn	340.324	0:00:30	6.3	0:00:15	1.7	1.334	0	358
mn161117-10	mn	943.368	0:00:15	1.7	0:04:54	117	2.669	0	542
mn161117-10	mn	131.169	0:04:54	117	0:00:13	1.7	0.751	0	254
mn161117-10	mn	343.1285	0:00:13	1.7	0:00:11	1.3	1.251	0	341
mn161117-10	mn	NA	0:00:11	1.3	0:00:12	1.7	1.168	0	NA
mn161117-10	mn	637.3925	0:00:12	1.7	0:02:43	100.4	2.002	0	456
mn161117-10	mn	NA	0:02:43	100.4	0:00:14	2.4	NA	0	NA
mn161117-10	mn	NA	0:00:14	2.4	0:00:15	2.1	NA	0	NA
mn161117-10	mn	NA	0:00:15	2.1	0:03:08	104	NA	0	NA
mn161117-10	mn	NA	0:03:08	107.8	0:00:11	2	NA	0	NA
mn161117-10	mn	NA	0:00:11	2	0:03:23	104.7	NA	1	NA
mn161117-10	mn	NA	0:03:23	104.7	0:00:08	1.5	0.625	1	NA
mn161117-10	mn	600.9485	0:00:08	1.5	0:03:07	109.8	2.168	0	405
mn161117-10	mn	NA	0:03:07	109.8	0:00:16	2.4	NA	0	NA
mn161117-10	mn	NA	0:00:16	2.4	0:00:14	1.6	NA	0	NA
mn161117-10	mn	NA	0:00:14	1.6	0:00:13	1.8	NA	0	NA
mn161117-10	mn	294.7905	0:00:13	1.8	0:03:06	114.9	1.584	0	233
mn161117-10	mn	146.1105	0:03:06	114.9	0:00:16	2.2	0.917	0	208
mn161117-10	mn	183.766	0:00:16	2.2	0:00:17	2.3	0.834	0	330
mn161117-10	mn	225.6805	0:00:17	2.3	0:00:21	2.5	1.001	0	301
mn161117-10	mn	293.1695	0:00:21	2.5	0:02:34	35.9	1.501	0	254
mn161117-10	mn	223.167	0:02:34	35.9	0:00:19	3	1.584	0	240
mn161117-10	mn	187.899	0:00:19	3	0:00:25	2.4	2.419	0	259
mn161117-10	mn	276.5985	0:00:25	2.4	0:00:19	2.1	1.285	0	273
mn161117-10	mn	NA	0:00:19	2.1	0:02:57	107.1	1.835	1	NA
mn161117-10	mn	97.2335	0:02:57	107.1	0:00:15	2.2	1	1	137
mn161117-10	mn	166.0815	0:00:15	2.2	0:00:12	1.7	0.834	0	278
mn161117-10	mn	255.392	0:00:12	1.7	0:00:12	2.1	1.168	0	291
mn161117-10	mn	576.8065	0:00:12	2.1	0:02:47	104.5	2.118	0	412
mn161117-10	mn	165.5055	0:02:47	104.5	0:00:05	1.1	1.084	0	217
mn161117-10	mn	412.7665	0:00:05	1.1	0:02:42	108.1	1.835	0	361
mn161117-10	mn	NA	0:02:42	108.1	0:00:14	2.7	1.016	0	NA
mn161117-10	mn	607.396	0:00:14	2.7	0:02:29	101.5	2.085	2	404
mn161117-10	mn	59.9525	0:02:29	101.5	0:00:15	2.1	0.834	2	103
mn161117-10	mn	244.1775	0:00:15	2.1	0:00:12	1.7	1.001	0	NA
bb190228-55b	bb	226.7385	0:03:44	135.5	0:00:22	3.6	0.701	0	485
bb190228-55b	bb	213.786	0:00:22	3.6	0:00:22	2.8	0.634	0	414
bb190228-55b	bb	249.229	0:00:22	2.8	0:00:24	3.1	0.801	0	430
bb190228-55b	bb	206.9355	0:00:24	3.1	0:00:24	2.6	0.801	0	390
bb190228-55b	bb	367.083	0:00:24	2.6	0:03:48	118.6	0.801	1	687
bb190228-55b	bb	196.5355	0:03:48	118.6	0:00:10	1.4	0.734	1	365
bb190228-55b	bb	199.07	0:00:10	1.4	0:00:11	1.4	0.734	0	375
bb190228-55b	bb	184.5515	0:00:11	1.4	0:00:17	1.8	0.667	0	389
bb190228-55b	bb	211.6035	0:00:17	1.8	0:00:38	2.8	0.801	0	386
bb190228-55b	bb	202.273	0:00:38	2.8	0:00:20	2.5	0.667	0	401
bb190228-55b	bb	493.1295	0:00:20	2.5	0:05:25	250	0.868	2	707
bb190228-55b	bb	271.878	0:04:36	133	0:00:14	2.1	0.734	2	491
bb190228-55b	bb	275.321	0:00:14	2.1	0:00:13	1.6	0.734	0	494
bb190228-55b	bb	285.1815	0:00:13	1.6	0:00:17	1.7	0.801	0	442
bb190228-55b	bb	302.4815	0:00:17	1.7	0:00:39	6.7	0.767	0	468
bb190228-55b	bb	286.75	0:00:39	6.7	0:01:28	7.5	0.734	0	499
bb190228-55b	bb	250.8805	0:01:28	7.5	0:00:25	3.4	0.734	0	427
bb190228-55b	bb	231.648	0:00:25	3.4	0:00:28	4.3	0.601	0	498
bb190228-55b	bb	524.3935	0:00:28	4.3	0:03:17	121.1	0.867	6	741
bb190228-55b	bb	324.8765	0:03:17	121.1	0:00:16	5.1	0.734	6	632
bb190228-55b	bb	239.417	0:00:16	5.1	0:00:17	1.4	0.734	0	454
bb190228-55b	bb	207.4915	0:00:17	1.4	0:00:18	1.8	0.601	0	495
bb190228-55b	bb	183.3185	0:00:18	1.8	0:00:18	2	0.734	0	423
bb190228-55b	bb	210.516	0:00:18	2	0:00:18	1.8	0.601	0	480
bb190228-55b	bb	246.861	0:00:18	1.8	0:00:17	2.1	0.7	0	512
bb190228-55b	bb	505.467	0:00:17	2.1	0:03:41	123.2	0.934	7	773
bb190228-55b	bb	219.8275	0:03:41	123.2	0:00:17	3	0.667	7	NA
bb190228-55b	bb	228.233	0:00:17	3	0:00:14	2	0.667	0	468
bb190228-55b	bb	235.7695	0:00:14	2	0:00:15	2	0.668	0	434
bb190228-55b	bb	284.1475	0:00:15	2	0:00:14	1.6	0.734	0	420
bb190228-55b	bb	239.8245	0:00:14	1.6	0:00:26	2.3	0.667	0	439
bb190228-55b	bb	306.738	0:00:26	2.3	0:00:20	2	0.734	0	590
bb190228-55b	bb	600.0725	0:00:20	2	0:04:00	140.6	0.968	7	763
bb190228-55b	bb	226.6205	0:04:00	140.6	0:00:21	3.3	0.567	7	555
bb190228-55b	bb	310.2005	0:00:21	3.3	0:00:16	3.2	0.735	0	617
bb190228-55b	bb	157.6445	0:00:16	3.2	0:00:15	1.9	0.682	0	326
bb190228-55b	bb	255.747	0:00:15	1.9	0:00:26	2.3	0.934	0	349
bb190228-55b	bb	182.973	0:00:26	2.3	0:00:18	2.1	0.734	0	411
bb190228-55b	bb	209.535	0:00:18	2.1	0:00:25	1.8	0.767	0	407
bb190228-55b	bb	191.145	0:00:25	1.8	0:00:21	1.2	0.668	0	375
bb190228-55b	bb	NA	0:00:21	1.2	0:00:12	1	1.067	0	NA
bb190228-55b	bb	168.902	0:00:12	1	0:00:14	1.4	0.634	0	356
bb190228-55b	bb	394.049	0:00:14	1.4	0:05:25	201.7	0.834	3	642
bb190228-55b	bb	220.3515	0:05:25	201.7	0:00:18	2.6	0.734	3	501
bb190228-55b	bb	168.9115	0:00:18	2.6	0:00:17	4.6	0.7	0	NA
bb190228-55b	bb	204.7475	0:00:17	4.6	0:00:16	1.4	0.634	0	443
bb190228-55b	bb	233.8295	0:00:16	1.4	0:00:24	1.4	0.701	0	502
bb190228-55b	bb	220.299	0:00:24	1.4	0:00:25	2	0.734	0	NA
bb190228-55b	bb	207.2555	0:00:25	2	0:02:39	5.3	0.768	0	362
bb190228-55b	bb	NA	0:04:58	118.2	0:00:22	4.2	0.934	6	NA
bb190228-55b	bb	162.2735	0:00:22	4.2	0:00:07	NA	0.634	0	371
bb190228-55b	bb	158.461	0:00:07	NA	0:00:17	2.3	0.701	0	283
bb190228-55b	bb	149.9745	0:00:17	2.3	0:00:21	2.7	0.567	0	340
bb190228-55b	bb	200.2255	0:00:21	2.7	0:00:21	3	0.734	0	385
bb190228-55b	bb	168.285	0:00:21	3	0:00:18	2.4	0.7	0	NA
bb190228-55b	bb	337.5625	0:00:18	2.4	0:03:35	106.8	0.901	5	514
bb190228-55b	bb	160.0625	0:03:35	106.8	0:00:19	1.5	0.7	5	317
bb190228-55b	bb	145.3545	0:00:19	1.5	0:00:17	1.9	0.567	0	332
bb190228-55b	bb	201.732	0:00:17	1.9	0:00:11	1.5	0.701	0	406
bb190228-55b	bb	181.4965	0:00:11	1.5	0:00:12	1.8	0.633	0	367
bb190228-55b	bb	144.1675	0:00:12	1.8	0:00:12	1.3	0.667	0	274
bb190228-55b	bb	301.2115	0:00:12	1.3	0:03:26	125.3	0.901	7	452
bb190228-55b	bb	189.499	0:03:26	125.3	0:00:13	NA	0.701	7	380
bb190228-55b	bb	196.9705	0:00:13	NA	0:00:11	1.5	0.701	0	439
bb190228-55b	bb	131.8545	0:00:11	1.5	0:00:12	1.3	0.6	0	305
bb190228-55b	bb	160.818	0:00:12	1.3	0:00:12	1.5	0.667	0	318
bb190228-55b	bb	192.6395	0:00:12	1.5	0:00:19	1.8	0.601	0	445
bb190228-55b	bb	165.5775	0:00:19	1.8	0:00:33	1.4	0.668	0	335
bb190228-55b	bb	155.6695	0:00:33	1.4	0:00:14	1.5	0.567	0	402
bb190228-55b	bb	381.671	0:00:14	1.5	0:03:37	137.9	0.901	8	542
bb190228-55b	bb	211.317	0:03:37	137.9	0:00:15	2.4	0.634	8	458
bb190228-55b	bb	191.8625	0:00:15	2.4	0:00:12	1.6	0.634	0	397
bb190228-55b	bb	171.775	0:00:12	1.6	0:00:11	1.3	0.601	0	367
bb190228-55b	bb	165.397	0:00:11	1.3	0:00:17	1.6	0.667	0	312
bb190228-55b	bb	201.018	0:00:17	1.6	0:00:17	1.6	0.668	0	399
bb190228-55b	bb	129.0625	0:00:17	1.6	0:00:13	1.3	0.634	0	257
bb190228-55b	bb	138.1755	0:00:13	1.3	0:00:18	1.7	0.7	0	271
bb190228-55b	bb	136.3975	0:00:18	1.7	0:00:16	1.5	0.601	0	299
bb190228-55b	bb	338.8675	0:00:16	1.5	0:03:47	148.4	0.934	7	501
bb190228-55b	bb	169.2935	0:03:47	148.4	0:00:14	2.1	0.274	7	339
bb190228-55b	bb	199.417	0:00:14	2.1	0:00:13	1.5	0.7	0	365
bb190228-55b	bb	NA	0:00:13	1.5	0:00:12	1.5	0.667	0	NA
bb190228-55b	bb	158.278	0:00:12	1.5	0:00:16	1.9	0.667	0	327
bb190228-55b	bb	157.7055	0:00:16	1.9	0:00:17	1.5	0.668	0	320
bb190228-55b	bb	204.663	0:00:17	1.5	0:00:19	1.7	0.667	0	386
bb190228-55b	bb	185.292	0:00:19	1.7	0:00:23	1.7	0.667	0	351
bb190228-55b	bb	151.197	0:00:23	1.7	0:00:22	1.9	0.668	0	299
bb190228-55b	bb	172.119	0:00:22	1.9	0:00:18	1.7	0.768	0	279
bb190228-55b	bb	NA	0:00:18	1.7	0:00:15	1.2	0.734	0	NA
bb190228-55b	bb	306.5845	0:00:15	1.2	0:03:56	83.8	1.068	4	377
bb190228-55b	bb	155.4435	0:03:56	83.8	0:00:16	2.2	0.701	4	297
bb190228-55b	bb	183.1405	0:00:16	2.2	0:00:13	1.2	0.791	0	346
bb190228-55b	bb	185.2345	0:00:13	1.2	0:00:13	1.6	0.701	0	376
bb190228-55b	bb	164.7185	0:00:13	1.6	0:00:14	1.4	0.6	0	360
bb190228-55b	bb	162.86	0:00:14	1.4	0:00:14	1.3	0.634	0	376
bb190228-55b	bb	187.228	0:00:14	1.3	0:00:18	1.6	0.634	0	419
bb190228-55b	bb	360.496	0:00:18	1.6	0:03:35	113.7	0.934	5	469
bb190228-55b	bb	160.726	0:03:35	113.7	0:00:12	1.2	0.834	5	315
bb190228-55b	bb	255.853	0:00:12	1.2	0:00:08	0.8	0.734	0	440
bb190228-55b	bb	202.8235	0:00:08	0.8	0:00:11	1	0.634	0	445
bb190228-55b	bb	163.711	0:00:11	1	0:00:11	1	0.6	0	356
bb190228-55b	bb	206.879	0:00:11	1	0:00:13	1.1	0.634	0	427
bb190228-55b	bb	203.7275	0:00:13	1.1	0:00:14	1.4	0.668	0	404
bb190228-55b	bb	125.7995	0:00:14	1.4	0:00:19	0.8	0.6	0	277
bb190228-55b	bb	164.413	0:00:19	0.8	0:00:17	1.2	0.6	0	368
bb190228-55b	bb	563.857	0:00:17	1.2	0:03:15	146.4	1.001	6	739
bb190228-55b	bb	211.714	0:03:15	146.4	0:00:16	2.2	0.634	6	426
bb190228-55b	bb	160.5155	0:00:16	2.2	0:00:18	2.2	0.701	0	300
bb190228-55b	bb	137.942	0:00:18	2.2	0:00:25	2.1	0.634	0	307
bb190228-55b	bb	NA	0:00:25	2.1	0:00:19	1.7	0.667	0	NA
bb190228-55b	bb	194.191	0:00:19	1.7	0:00:15	1.4	0.734	0	348
bb190228-55b	bb	399.13	0:00:15	1.4	0:02:43	113..7	0.634	8	586
bb190228-55b	bb	175.705	0:04:06	130.49	0:00:10	1.6	0.801	5	321
bb190228-55b	bb	NA	0:00:10	1.6	0:00:06	0.6	0.734	0	NA
bb190228-55b	bb	NA	0:00:06	0.6	0:00:12	1	0.667	0	NA
bb190228-55b	bb	NA	0:00:12	1	0:00:11	1.1	0.734	0	NA
bb190228-55b	bb	NA	0:00:11	1.1	0:00:16	1.3	0.668	0	NA
bb190228-55b	bb	471.2675	0:00:16	1.3	0:03:19	149	0.867	7	666
bb190228-55b	bb	233.6805	0:03:19	149	0:00:13	2.2	0.801	7	385
bb190228-55b	bb	NA	0:00:13	2.2	0:00:09	1.1	0.801	0	NA
bb190228-55b	bb	NA	0:00:09	1.1	0:00:11	0.7	0.6	1	NA
bb190228-55b	bb	NA	0:00:11	0.7	0:00:13	1	1.001	2	NA
bb190228-55b	bb	NA	0:00:13	1	0:00:26	1.3	1.134	3	NA
bb190228-55b	bb	419.4255	0:00:26	1.3	0:03:45	133.8	1.001	8	608
bb190228-55b	bb	218.038	0:03:45	133.8	0:00:14	1.6	0.801	8	409
bb190228-55b	bb	NA	0:00:14	1.6	0:00:11	1.1	0.667	0	NA
bb190228-55b	bb	NA	0:00:11	1.1	0:00:14	1.6	0.801	0	NA
bb190228-55b	bb	NA	0:00:14	1.6	0:00:12	1.8	0.867	0	NA
bb190228-55b	bb	NA	0:00:12	1.8	0:00:14	1.2	0.734	0	NA
bb190228-55b	bb	NA	0:00:14	1.2	0:00:19	1.6	0.868	0	NA
bb190228-55b	bb	NA	0:00:19	1.6	0:03:53	148.9	0.801	6	NA
bb190228-55b	bb	235.4455	0:03:53	148.9	0:00:14	2	0.734	6	412
bb190228-55b	bb	503.723	0:00:15	0.8	0:03:48	144.7	1.001	8	710
bb190228-55b	bb	250.4085	0:03:48	144.7	0:00:15	2	0.734	8	414
bb190228-55b	bb	521.214	0:00:17	0.9	0:03:56	162.7	0.935	10	713
bb190228-55b	bb	198.794	0:03:56	162.7	0:00:10	1.5	0.734	10	360
bb190228-55b	bb	497.8735	0:00:10	1.8	0:05:15	172.18	0.935	12	NA
bb190309-52	bb	NA	0:06:16	196.82	0:00:22	2.6	0.467	5	NA
bb190309-52	bb	64.027	0:00:22	2.6	0:00:12	1.9	0.567	0	196
bb190309-52	bb	NA	0:00:12	1.9	0:00:10	1.8	0.567	0	NA
bb190309-52	bb	62.8715	0:00:10	1.8	0:00:25	3.5	0.534	0	221
bb190309-52	bb	20.7845	0:00:25	3.5	0:00:30	4.1	0.4	0	95
bb190309-52	bb	42.569	0:00:30	4.1	0:01:59	5.8	0.534	0	120
bb190309-52	bb	73.4355	0:01:59	5.8	0:00:19	2.3	0.534	0	191
bb190309-52	bb	34.966	0:00:19	2.3	0:00:41	4.9	0.468	0	118
bb190309-52	bb	182.521	0:00:41	4.9	0:06:47	124.7	0.734	5	416
bb190309-52	bb	105.953	0:06:47	124.7	0:00:13	1	0.667	5	213
bb190309-52	bb	NA	0:00:13	1	0:00:10	0.7	0.4	0	NA
bb190309-52	bb	121.853	0:00:10	0.7	0:00:07	0.4	0.801	0	291
bb190309-52	bb	64.1475	0:00:07	0.4	0:00:09	0.6	0.734	0	130
bb190309-52	bb	63.306	0:00:09	0.6	0:00:12	0.8	0.6	0	163
bb190309-52	bb	72.3095	0:00:12	0.8	0:00:17	1.1	0.734	0	149
bb190309-52	bb	119.039	0:00:17	1.1	0:00:09	1.6	0.801	0	223
bb190309-52	bb	76.1845	0:00:09	1.6	0:05:22	110	0.534	3	243
bb190309-52	bb	30.7915	0:05:22	110	0:00:16	2.4	0.333	3	141
bb190309-52	bb	124.3965	0:00:16	2.4	0:01:38	5.7	0.734	0	239
bb190309-52	bb	49.6215	0:01:38	5.7	0:00:24	2.9	0.534	0	142
bb190309-52	bb	42.9025	0:00:24	2.9	0:00:26	4.4	0.434	0	168
bb190309-52	bb	19.2015	0:00:26	4.4	0:00:14	1.7	0.334	0	88
bb190309-52	bb	96.5935	0:00:14	1.7	0:08:30	191.72	0.634	0	254
bb190309-52	bb	21.1395	0:08:30	191.72	0:00:11	0.6	0.334	0	101
bb190309-52	bb	36.6255	0:00:11	0.6	0:00:10	0.5	0.434	0	131
bb190309-52	bb	34.4175	0:00:10	0.5	0:00:09	0.4	0.6	0	90
bb190309-52	bb	67.2455	0:00:09	0.4	0:00:17	0.5	0.567	0	182
bb190309-52	bb	86.886	0:00:17	0.5	0:00:21	1.3	0.667	0	183
bb190309-52	bb	29.6855	0:00:21	1.3	0:00:23	2.1	0.601	0	79
bb190309-52	bb	83.6355	0:00:23	2.1	0:00:19	2	0.701	0	179
bb190309-52	bb	84.3085	0:00:19	2	0:00:17	2	0.667	0	202
bb190309-52	bb	110.3155	0:00:17	2	0:06:47	195.6	0.6	7	415
bb190309-52	bb	7.555	0:06:47	195.6	0:00:14	1.4	0.201	7	69
bb190309-52	bb	109.37	0:00:14	1.4	0:00:12	1.1	0.667	0	343
bb190309-52	bb	77.6985	0:00:12	1.1	0:00:12	1	0.601	0	289
bb190309-52	bb	55.5925	0:00:12	1	0:00:11	1	0.434	0	236
bb190309-52	bb	12.462	0:00:11	1	0:00:13	0.9	0.267	0	97
bb190309-52	bb	76.4365	0:00:13	0.9	0:05:33	195	0.601	7	191
bb190309-52	bb	8.588	0:05:33	195	0:00:15	1.5	0.167	7	70
bb190309-52	bb	43.877	0:00:15	1.5	0:00:13	1.3	0.401	0	165
bb190309-52	bb	111.8515	0:00:13	1.3	0:00:12	1.1	0.501	0	381
bb190309-52	bb	69.761	0:00:12	1.1	0:00:12	1.5	0.501	0	285
bb190309-52	bb	71.718	0:00:12	1.5	0:00:10	1.2	0.567	0	268
bb190309-52	bb	113.155	0:00:10	1.2	0:00:26	2.4	0.667	0	443
bb190309-52	bb	34.7685	0:00:26	2.4	0:00:48	4.7	0.4	0	157
bb190309-52	bb	33.0755	0:00:48	4.7	0:00:18	3	0.3	0	126
bb190309-52	bb	53.095	0:00:18	3	0:00:22	2.4	0.568	0	197
bb190309-52	bb	142.975	0:00:22	2.4	0:09:22	213.27	0.767	3	365
bb190309-52	bb	20.793	0:07:51	236.27	0:00:13	1.1	0.3	7	144
bb190309-52	bb	14.9595	0:00:13	1.1	0:00:10	0.7	0.233	0	94
bb190309-52	bb	6.891	0:00:10	0.7	0:00:09	0.8	0.134	0	80
bb190309-52	bb	34.193	0:00:09	0.8	0:00:09	0.5	0.434	0	114
bb190309-52	bb	26.5165	0:00:09	0.5	0:00:11	1	0.301	0	125
bb190309-52	bb	26.597	0:00:11	1	0:00:13	NA	0.333	0	137
bb190309-52	bb	24.771	0:00:13	0.9	0:00:34	3.3	0.334	0	95
bb190309-52	bb	8.626	0:00:34	3.3	0:00:22	1	0.234	0	52
bb190309-52	bb	156.4665	0:00:22	1	0:00:13	1.6	0.734	0	346
bb190309-52	bb	110.2995	0:00:13	1.6	0:06:16	247.85	0.567	11	412
bb190309-52	bb	NA	0:06:16	247.85	0:00:09	0.6	0.534	11	NA
bb190309-52	bb	78.203	0:00:09	0.6	0:00:10	0.6	0.568	0	249
bb190309-52	bb	68.226	0:00:10	0.6	0:00:08	0.4	0.667	0	147
bb190309-52	bb	79.816	0:00:08	0.4	0:00:06	0.3	0.601	0	207
bb190309-52	bb	63.6245	0:00:06	0.3	0:00:08	0.4	0.567	0	174
bb190309-52	bb	63.1215	0:00:08	0.4	0:00:08	0.4	0.667	0	205
bb190309-52	bb	102.0105	0:00:08	0.4	0:00:14	NA	0.7	0	224
bb190309-52	bb	56.065	0:00:14	1.1	0:00:27	1.6	0.634	0	149
bb190309-52	bb	113.5575	0:00:27	1.6	0:00:19	1.2	0.7	0	220
bb190309-52	bb	30.122	0:00:19	1.2	0:00:26	1.6	0.434	0	161
bb190309-52	bb	50.9235	0:00:26	1.6	0:00:18	0.9	0.601	0	308
bb190309-52	bb	80.5825	0:00:18	0.9	0:00:20	NA	0.634	0	110
bb190309-52	bb	144.6375	0:00:20	NA	0:04:31	223	0.867	6	301
bb190309-52	bb	30.401	0:04:31	223	0:00:13	1.1	0.818	6	149
bb190309-52	bb	6.5115	0:00:13	1.1	0:00:11	0.7	0.133	0	77
bb190309-52	bb	23.9445	0:00:11	0.7	0:00:09	0.6	0.401	0	81
bb190309-52	bb	17.666	0:00:09	0.6	0:00:09	0.5	0.334	0	97
bb190309-52	bb	30.162	0:00:09	0.5	0:00:11	0.6	0.467	0	98
bb190309-52	bb	30.58	0:00:11	0.6	0:00:18	NA	0.468	0	120
bb190309-52	bb	13.375	0:00:18	3.3	0:00:27	1.8	0.267	0	115
bb190309-52	bb	12.359	0:00:27	1.8	0:00:31	2.2	0.333	0	59
bb190309-52	bb	14.185	0:00:31	2.2	0:00:21	1.6	0.334	0	55
bb190309-52	bb	5.1135	0:00:21	1.6	0:00:13	1.4	0.2	0	49
bb190309-52	bb	117.6005	0:00:13	1.4	0:05:49	228.8	0.668	9	NA
bb190309-52	bb	25.6505	0:05:49	228.8	0:00:12	0.8	0.401	9	124
bb190309-52	bb	19.124	0:00:12	0.8	0:00:09	0.6	0.334	0	93
bb190309-52	bb	59.231	0:00:09	0.6	0:00:09	0.6	0.601	0	102
bb190309-52	bb	28.455	0:00:09	0.6	0:00:09	0.6	0.4	0	183
bb190309-52	bb	58.0215	0:00:09	0.6	0:00:08	0.4	0.534	0	144
bb190309-52	bb	11.208	0:00:08	0.4	0:00:10	0.7	0.266	0	200
bb190309-52	bb	26.8175	0:00:10	0.7	0:00:08	NA	0.468	0	63
bb190309-52	bb	41.551	0:00:08	2.1	0:00:32	2	0.534	0	92
bb190309-52	bb	66.764	0:00:32	2	0:00:19	1.4	0.667	0	119
bb190309-52	bb	68.272	0:00:19	1.4	0:00:21	1.7	0.6	0	176
bb190309-52	bb	17.634	0:00:21	1.7	0:00:17	1.6	0.333	0	208
bb190309-52	bb	60.7765	0:00:17	1.6	0:05:54	250.16	0.534	8	297
bb190309-52	bb	14.0475	0:05:54	250.16	0:00:12	0.9	0.334	8	74
bb190309-52	bb	52.3165	0:00:12	0.9	0:00:10	0.7	0.534	0	175
bb190309-52	bb	28.5285	0:00:10	0.7	0:00:11	0.8	0.467	0	78
bb190309-52	bb	36.552	0:00:11	0.8	0:00:11	0.8	0.601	0	142
bb190309-52	bb	27.076	0:00:11	0.8	0:00:06	0.7	0.467	0	110
bb190309-52	bb	37.0155	0:00:06	1.2	0:00:28	2.2	0.467	0	106
bb190309-52	bb	23.6905	0:00:28	2.2	0:00:41	1.5	0.334	0	98
bb190309-52	bb	31.822	0:00:41	1.5	0:00:47	2.5	0.434	0	160
bb190309-52	bb	29.239	0:00:47	2.5	0:00:31	1.5	0.401	0	202
bb190309-52	bb	21.716	0:00:31	1.5	0:00:24	1.4	0.4	0	115
bb190309-52	bb	19.6875	0:00:24	1.4	0:00:17	1	0.401	0	121
bb190309-52	bb	43.407	0:00:17	1	0:00:23	1.5	0.6	0	94
bb190309-52	bb	NA	0:00:23	1.5	0:00:11	0.8	0.133	0	NA
bb190309-52	bb	NA	0:00:11	0.8	0:04:43	252.2	NA	6	NA
bb180304-45	bb	36.118	0:05:55	76.2	0:00:13	1.9	0.534	6	117
bb180304-45	bb	60.44	0:00:13	1.9	0:00:10	1.2	0.667	0	141
bb180304-45	bb	81.9445	0:00:10	1.2	0:00:13	1.6	0.734	0	156
bb180304-45	bb	71.197	0:00:13	1.6	0:00:09	1.2	0.734	0	133
bb180304-45	bb	165.578	0:00:09	1.2	0:00:15	2.2	0.734	0	117
bb180304-45	bb	79.5535	0:00:15	2.2	0:00:15	2.9	0.601	0	180
bb180304-45	bb	66.857	0:00:15	2.9	0:00:17	3.4	0.6	0	189
bb180304-45	bb	64.1755	0:00:17	3.4	0:00:15	2.7	0.601	0	158
bb180304-45	bb	106.503	0:00:15	2.7	0:00:42	12.2	0.868	0	185
bb180304-45	bb	111.568	0:00:42	12.2	0:04:08	80.4	0.867	1	216
bb180304-45	bb	85.925	0:04:08	80.4	0:00:17	3.4	0.734	1	173
bb180304-45	bb	68.229	0:00:17	3.4	0:00:18	2.5	0.734	0	134
bb180304-45	bb	95.5165	0:00:18	2.5	0:01:13	6.6	0.801	0	168
bb180304-45	bb	63.455	0:01:13	6.6	0:00:30	4.8	0.667	0	157
bb180304-45	bb	95.0845	0:00:30	4.8	0:01:19	10.5	0.734	0	172
bb180304-45	bb	103.1295	0:01:19	10.5	0:00:22	2.9	0.868	0	166
bb180304-45	bb	81.243	0:00:22	2.9	0:00:20	3.8	0.867	0	135
bb180304-45	bb	131.2515	0:00:20	3.8	0:04:00	103.3	0.867	8	222
bb180304-45	bb	18.7675	0:04:00	178.3	0:00:14	2.9	0.4	8	75
bb180304-45	bb	25.841	0:00:14	2.9	0:00:22	6	0.333	0	129
bb180304-45	bb	NA	0:00:22	6	0:00:15	2.2	0.801	0	142
bb180304-45	bb	7.705	0:00:15	2.2	0:00:13	1.9	0.267	0	150
bb180304-45	bb	103.8345	0:00:13	1.9	0:00:18	3.7	0.734	0	151
bb180304-45	bb	88.3695	0:00:18	3.7	0:00:22	3.6	0.534	0	NA
bb180304-45	bb	39.0875	0:00:22	3.6	0:00:36	7	0.6	0	108
bb180304-45	bb	16.36	0:00:36	7	0:02:10	12	0.333	0	135
bb180304-45	bb	NA	0:02:10	12	0:00:31	3.6	0.734	0	NA
bb180304-45	bb	52.583	0:00:31	3.6	0:00:31	4.2	0.667	0	51
bb180304-45	bb	43.9665	0:00:31	4.2	0:00:33	6	0.6	0	126
bb180304-45	bb	78.518	0:00:33	6	0:00:50	8.9	0.734	0	96
bb180304-45	bb	45.909	0:00:50	8.9	0:00:43	8.6	0.534	0	97
bb180304-45	bb	NA	0:00:43	8.6	0:00:21	2.7	0.934	0	94
bb180304-45	bb	32.7665	0:00:21	2.7	0:00:27	2.7	0.534	0	NA
bb180304-45	bb	58.8925	0:00:27	2.7	0:00:14	1.7	0.667	0	114
bb180304-45	bb	132.3085	0:00:14	1.7	0:05:54	179.5	1.001	10	197
bb180304-45	bb	12.6515	0:05:54	179.5	0:00:32	5.2	0.267	10	82
bb180304-45	bb	48.5535	0:00:32	5.2	0:00:17	2.7	0.533	0	144
bb180304-45	bb	19.3235	0:00:17	2.7	0:00:22	4.3	0.467	0	74
bb180304-45	bb	21.726	0:00:22	4.3	0:00:16	2.4	0.401	0	87
bb180304-45	bb	41.5485	0:00:16	2.4	0:00:15	2.3	0.6	0	122
bb180304-45	bb	77.2885	0:00:15	2.3	0:02:51	11.1	0.734	0	206
bb180304-45	bb	3.662	0:02:51	11.1	0:00:20	3.8	0.2	0	36
bb180304-45	bb	13.096	0:00:20	3.8	0:00:16	2	0.334	0	80
bb180304-45	bb	65.8085	0:00:16	2	0:00:21	3.2	0.668	0	162
bb180304-45	bb	53.7865	0:00:21	3.2	0:01:27	12.9	0.667	0	130
bb180304-45	bb	NA	0:01:27	12.9	0:00:15	1.5	0.266	0	NA
bb180304-45	bb	NA	0:00:15	1.5	0:00:17	2	0.133	0	NA
bb180304-45	bb	20.035	0:00:17	2	0:00:15	1.5	0.4	0	93
bb180304-45	bb	133.248	0:00:15	1.5	0:06:20	177.87	1.001	6	208
bb180304-45	bb	38.6515	0:06:20	177.87	0:00:28	5.7	0.433	6	152
bb180304-45	bb	6.471	0:00:28	5.7	0:00:16	3.8	0.233	0	46
bb180304-45	bb	8.2355	0:00:16	3.8	0:00:13	2	0.267	0	84
bb180304-45	bb	23.2375	0:00:13	2	0:00:20	4.5	0.4	0	119
bb180304-45	bb	21.774	0:00:20	4.5	0:00:36	6.4	0.367	0	NA
bb180304-45	bb	21.9505	0:00:36	6.4	0:00:20	3.3	0.367	0	54
bb180304-45	bb	27.0775	0:00:20	3.3	0:00:21	3.8	0.367	0	101
bb180304-45	bb	32.594	0:00:21	3.8	0:00:20	3	0.4	0	119
bb180304-45	bb	30.895	0:00:20	3	0:01:17	8.4	0.433	0	91
bb180304-45	bb	NA	0:01:17	8.4	0:00:14	5.3	0.334	0	150
bb180304-45	bb	18.589	0:00:14	5.3	0:00:26	4	0.401	0	151
bb180304-45	bb	27.606	0:00:26	4	0:00:41	6	0.434	0	117
bb180304-45	bb	NA	0:00:41	6	0:00:35	2.4	0.567	0	NA
bb180304-45	bb	38.86	0:00:35	2.4	0:05:13	39	0.467	0	147
bb180304-45	bb	NA	0:01:30	37.8	0:00:22	8.1	0.401	0	NA
bb180304-45	bb	43.9885	0:00:18	8.1	0:02:32	30.4	0.5	0	147
bb180304-45	bb	NA	0:02:32	30.4	0:00:33	NA	0.4	0	NA
bb180304-45	bb	NA	0:00:35	NA	0:02:22	NA	0.734	0	NA
bb190224-52	bb	42.3825	0:01:24	24.2	0:00:05	0.7	0.534	5	114
bb190224-52	bb	14.832	0:00:05	0.7	0:00:40	22.6	0.267	2	111
bb190224-52	bb	24.9735	0:00:40	22.6	0:00:08	0.8	0.333	2	128
bb190224-52	bb	13.9695	0:00:08	0.8	0:00:16	1.2	0.267	0	84
bb190224-52	bb	18.6745	0:00:16	1.2	0:00:14	0.5	0.333	0	96
bb190224-52	bb	53.0865	0:00:14	0.5	0:01:03	27.2	0.6	3	122
bb190224-52	bb	43.901	0:00:50	20.1	0:00:10	2.3	0.467	3	137
bb190224-52	bb	20.836	0:00:10	2.3	0:00:48	22.3	0.3	3	114
bb190224-52	bb	1.905	0:00:48	22.3	0:00:08	0.9	0.1	3	36
bb190224-52	bb	20.9995	0:00:08	0.9	0:00:42	36.1	0.3	2	109
bb190224-52	bb	40.39	0:00:42	36.1	0:00:04	0.4	0.467	2	138
bb190224-52	bb	49.897	0:00:04	0.4	0:00:55	23.8	0.534	3	131
bb190224-52	bb	8.611	0:00:37	16.8	0:00:04	0	0.233	2	58
bb190224-52	bb	37.3315	0:00:04	0	0:00:35	21.1	0.5	1	100
bb190224-52	bb	NA	0:00:34	15.7	0:00:08	1.3	NA	2	NA
bb190224-52	bb	NA	0:00:08	1.3	0:00:35	17.3	NA	2	NA
bb190224-52	bb	NA	0:00:35	17.3	0:00:09	1.3	NA	2	NA
bb190224-52	bb	NA	0:00:09	1.3	0:00:51	17.8	NA	3	NA
bb190224-52	bb	NA	0:00:51	17.8	0:00:13	1.3	0.267	3	NA
bb190224-52	bb	28.259	0:00:13	1.3	0:00:05	0	0.501	0	86
bb190224-52	bb	26.8935	0:00:05	0	0:00:19	0.3	0.467	0	77
bb190224-52	bb	NA	0:00:19	0.3	0:00:05	0.2	0.601	0	NA
bb190224-52	bb	29.278	0:00:05	0.2	0:00:09	0.1	0.434	0	100
bb190224-52	bb	NA	0:00:09	0.1	0:00:22	2.3	0.734	0	NA
bb190224-52	bb	43.941	0:00:22	2.3	0:00:52	18.5	0.567	3	124
bb190224-52	bb	11.2265	0:00:52	18.5	0:00:09	0.7	0.201	3	90
bb190224-52	bb	40.31	0:00:09	0.7	0:01:06	22.7	0.601	4	86
bb190224-52	bb	NA	0:01:06	22.7	0:00:11	1.4	0.267	4	NA
bb190224-52	bb	NA	0:00:11	1.4	0:00:55	23	0.233	2	NA
bb190224-52	bb	NA	0:00:55	23	0:00:13	2.4	0.267	0	NA
bb190224-52	bb	NA	0:00:13	2.4	0:00:18	3.6	0.401	0	NA
bb190224-52	bb	NA	0:00:18	3.6	0:00:56	4.5	0.4	0	NA
bb190224-52	bb	NA	0:00:56	4.5	0:01:41	2.4	0.333	0	NA
bb190224-52	bb	NA	0:01:41	2.4	0:00:13	1.4	0.567	0	87
bb190224-52	bb	33.414	0:00:13	1.4	0:00:50	3.1	0.3	0	65
bb190224-52	bb	7.1595	0:00:50	3.1	0:00:40	2.4	0.267	0	69
bb190224-52	bb	11.4565	0:00:40	2.4	0:00:05	0.2	0.501	0	71
bb190224-52	bb	17.0465	0:00:05	0.2	0:00:14	0.8	0.2	0	48
bb190224-52	bb	6.344	0:00:14	0.8	0:00:10	0.7	0.466	0	NA
bb190224-52	bb	35.9605	0:00:10	0.7	0:02:15	48.9	0.567	1	93
bb190224-52	bb	NA	0:01:20	15.3	0:00:09	0.6	0.334	2	NA
bb190224-52	bb	NA	0:00:09	0.6	0:00:10	0.3	0.133	0	NA
bb190224-52	bb	NA	0:00:10	0.3	0:00:15	0.7	0.467	0	NA
bb190224-52	bb	23.544	0:00:15	0.7	0:00:06	0.2	0.367	0	85
bb190224-52	bb	NA	0:00:06	0.2	0:00:20	2.1	0.334	0	NA
bb190224-52	bb	NA	0:00:20	2.1	0:01:35	22.05	0.467	4	NA
bb190224-52	bb	3.292	0:01:10	29.2	0:00:12	1.8	0.134	2	42
bb190224-52	bb	12.4705	0:00:12	1.8	0:00:09	1.2	0.3	0	69
bb190224-52	bb	7.236	0:00:09	1.2	0:00:11	1.7	0.234	0	54
bb190224-52	bb	28.4015	0:00:11	1.7	0:01:53	60.8	0.434	0	101
bb190224-52	bb	48.1345	0:01:53	60.8	0:00:13	1	0.534	0	126
bb190224-52	bb	NA	0:00:13	1	0:00:12	2.4	0.334	0	NA
bb190224-52	bb	34.098	0:00:12	2.4	0:02:17	33.4	0.434	2	117
bb190224-52	bb	14.364	0:02:17	33.4	0:00:14	2.6	0.234	2	91
bb190224-52	bb	34.463	0:00:14	2.6	0:01:03	14.8	0.401	0	119
bb190224-52	bb	27.393	0:01:03	14.8	0:02:12	69.2	0.4	0	106
bb190224-52	bb	25.9105	0:02:12	69.2	0:00:13	2.4	0.434	0	99
bb190224-52	bb	34.5855	0:00:13	2.4	0:02:42	89.5	0.533	2	99
bb190224-52	bb	10.6895	0:02:42	89.5	0:00:10	1.1	0.334	2	59
bb190224-52	bb	NA	0:00:10	1.1	0:00:05	0.3	0.267	0	NA
bb190224-52	bb	NA	0:00:05	0.3	0:00:10	0.9	0.2	0	NA
bb190224-52	bb	35.45	0:00:10	0.9	0:00:51	14.9	0.4	2	143
bb190224-52	bb	NA	0:00:51	18.3	0:00:10	1.5	0.333	2	NA
bb190224-52	bb	10.8575	0:00:10	1.5	0:00:07	1	0.267	0	62
bb190224-52	bb	15.7325	0:00:07	1	0:01:51	34.5	0.267	0	87
bb190224-52	bb	10.4935	0:01:51	34.5	0:00:13	1.4	0.233	0	66
bb190224-52	bb	NA	0:00:13	1.4	0:02:32	58.7	0.3	6	NA
bb190224-52	bb	NA	0:02:32	58.7	0:00:10	2	0.2	6	NA
bb190224-52	bb	16.9535	0:00:10	2	0:00:11	2.4	0.267	0	76
bb190224-52	bb	33.435	0:00:11	2.4	0:00:13	2.1	0.334	0	79
bb190224-52	bb	NA	0:00:13	2.1	0:02:20	58.7	0.434	2	100
bb190224-52	bb	NA	0:02:20	58.7	0:00:15	1.4	NA	2	NA
bb190224-52	bb	NA	0:00:15	1.4	0:00:07	0.7	NA	0	NA
bb190224-52	bb	31.1285	0:00:07	0.7	0:00:12	2.2	NA	0	NA
bb190224-52	bb	NA	0:00:12	2.2	0:00:09	1	0.534	0	81
bb190224-52	bb	NA	0:00:09	1	0:00:08	1.5	NA	0	NA
bb190224-52	bb	29.8955	0:00:08	1.5	0:00:09	1.5	NA	0	NA
bb190224-52	bb	NA	0:00:09	1.5	0:02:09	62.3	0.367	3	110
bb190224-52	bb	NA	0:02:09	62.3	0:00:09	2	NA	3	NA
bb190224-52	bb	NA	0:00:09	2	0:00:08	1.1	NA	0	NA
bb190224-52	bb	15.235	0:00:08	1.1	0:00:06	1	NA	0	NA
bb190224-52	bb	2.1775	0:00:06	1	0:01:38	48.8	0.334	5	85
bb190224-52	bb	NA	0:01:38	48.8	0:00:08	1.3	0.134	5	33
bb190224-52	bb	22.3405	0:00:08	1.3	0:00:10	1.2	0.334	0	NA
bb190224-52	bb	9.808	0:00:10	1.2	0:00:06	0.9	0.468	0	75
bb190224-52	bb	NA	0:00:06	0.9	0:02:14	61.2	0.233	6	86
bb190224-52	bb	NA	0:02:14	61.2	0:00:11	1.3	0.267	6	NA
bb190224-52	bb	2.299	0:00:11	1.3	0:00:08	0.7	0.2	0	NA
bb190224-52	bb	NA	0:00:08	0.7	0:00:09	1.2	0.2	0	25
bb190224-52	bb	3.6885	0:00:09	1.2	0:00:08	0.6	0.333	0	NA
bb190224-52	bb	NA	0:00:08	0.6	0:00:10	1.8	0.2	0	36
bb190224-52	bb	37.6535	0:00:10	1.8	0:00:08	0.7	0.201	0	NA
bb190224-52	bb	NA	0:00:08	0.7	0:01:56	58.7	0.468	5	151
bb190224-52	bb	NA	0:01:56	58.7	0:00:11	1.6	NA	5	NA
bb190224-52	bb	NA	0:00:11	1.6	0:00:11	1.6	NA	0	NA
bb190224-52	bb	NA	0:00:11	1.6	0:00:14	3.3	0.2	0	NA
bb190224-52	bb	NA	0:00:14	3.3	0:00:12	1.8	NA	0	NA
bb190224-52	bb	12.13	0:00:12	1.8	0:00:09	1.3	NA	0	NA
bb190224-52	bb	NA	0:00:09	1.3	0:02:11	60.7	0.333	6	84
bb190224-52	bb	NA	0:02:11	60.7	0:00:10	1.7	NA	6	NA
bb190224-52	bb	NA	0:00:10	1.7	0:00:05	1	NA	0	NA
bb190224-52	bb	19.0245	0:00:05	1	0:00:08	1.3	NA	0	NA
bb190224-52	bb	6.534	0:00:08	1.3	0:00:29	7.4	NA	0	79
bb190224-52	bb	23.0525	0:00:29	7.4	0:01:51	43.2	0.2	2	82
bb190224-52	bb	NA	0:01:51	43.2	0:00:11	2.5	0.4	2	97
bb190224-52	bb	16.0785	0:00:11	2.5	0:00:11	1.8	0.267	0	NA
bb190224-52	bb	NA	0:00:11	1.8	0:02:03	38.5	0.266	5	90
bb190224-52	bb	NA	0:02:03	38.5	0:00:09	1.3	NA	5	NA
bb190224-52	bb	NA	0:00:09	1.3	0:00:06	0.8	NA	0	NA
bb190224-52	bb	41.7955	0:00:06	0.8	0:00:07	1	NA	0	NA
bb190224-52	bb	NA	0:00:07	1	0:01:36	29.5	0.667	5	95
bb190224-52	bb	30.3255	0:01:36	29.5	0:00:09	0.5	0.467	5	NA
bb190224-52	bb	18.192	0:00:09	0.5	0:00:09	1.4	0.534	0	114
bb190224-52	bb	5.313	0:00:09	1.4	0:00:09	1.5	0.334	0	80
bb190224-52	bb	6.165	0:00:09	1.5	0:00:07	0.9	0.133	0	81
bb190224-52	bb	NA	0:00:07	0.9	0:01:17	29	0.2	5	71
bb190224-52	bb	1.832	0:01:17	29	0:00:07	1	0.267	5	NA
bb190224-52	bb	21.7845	0:00:07	1	0:00:03	0	0.167	0	20
bb190224-52	bb	19.2495	0:00:03	0	0:00:04	0.4	0.501	0	86
bb190224-52	bb	11.066	0:00:04	0.4	0:01:15	27.9	0.3	4	107
bb190224-52	bb	9.242	0:01:15	27.9	0:00:12	2.7	0.201	4	89
bb190224-52	bb	NA	0:00:12	2.7	0:01:09	26.2	0.2	4	94
bb190224-52	bb	1.319	0:01:09	26.2	0:00:06	0.8	0.133	4	NA
bb190224-52	bb	3.348	0:00:06	0.8	0:00:08	1.7	0.133	0	19
bb190224-52	bb	NA	0:00:08	1.7	0:00:57	17	0.167	3	40
bb190224-52	bb	10.606	0:00:57	17	0:00:12	1.6	0.2	3	NA
bb190224-52	bb	10.9115	0:00:12	1.6	0:00:58	15.3	0.234	3	89
bb190224-52	bb	6.176	0:00:58	15.3	0:00:13	2.1	0.2	3	87
bb190224-52	bb	NA	0:00:13	2.1	0:00:50	13.8	0.2	3	57
bb190224-52	bb	NA	0:00:50	13.8	0:00:42	2	0.133	3	NA
bb190224-52	bb	NA	0:00:42	2	0:00:47	16.3	0.334	2	NA
bb190224-52	bb	30.262	0:00:47	15.4	0:00:11	1.9	NA	3	NA
bb190224-52	bb	NA	0:00:11	1.9	0:00:13	3.6	0.434	0	118
bb190224-52	bb	NA	0:00:13	3.6	0:01:07	30.1	NA	4	NA
bb190224-52	bb	NA	0:01:07	30.1	0:00:04	0.5	0.2	4	NA
bb190224-52	bb	NA	0:00:04	0.5	0:00:07	0.9	0.2	0	NA
bb190224-52	bb	3.012	0:00:07	0.9	0:00:09	1.1	0.133	0	NA
bb190224-52	bb	2.3045	0:00:09	1.1	0:01:24	24.2	0.2	5	27
bb190224-52	bb	NA	0:01:24	24.2	0:00:11	1.8	0.133	5	34
bb190224-52	bb	NA	0:00:11	1.8	0:00:41	2.4	0.2	2	NA
bb190224-52	bb	NA	0:00:41	2.4	0:00:50	11.9	0.201	4	NA
bb190224-52	bb	NA	0:00:50	9.2	0:00:12	2.1	NA	4	NA
bb190224-52	bb	8.124	0:00:12	2.1	0:00:22	3.5	NA	0	NA
bb190224-52	bb	NA	0:00:22	3.5	0:00:26	5.2	0.267	0	55
bb190224-52	bb	NA	0:00:26	5.2	0:00:34	3.7	NA	1	NA
bb190224-52	bb	NA	0:00:34	3.7	0:00:28	4.3	NA	1	NA
bb190224-52	bb	NA	0:00:28	4.3	0:01:33	NA	NA	6	NA
