# Supplementary material for: Baleen whale inhalation variability revealed using animal-borne video tags
Source: PeerJ. 2022 Jul 20;10:e13724. doi: 10.7717/peerj.13724 (PMC9308462; doi:10.7717/peerj.13724)
Supplement: Supplemental Information 9 — This dataset is similar to File S1. This dataset, however, only includes complete surface sequences where every inhalation was recorded and was used for the creation of Fig. 5. [file peerj-10-13724-s009.csv]

	individualID	species	IA	prev_divedur	prev_divedep	following_divedur	follow_divedep	inhaledur	lungenum	max_area	SIA	NMA	breath_type	breath_n	breath_num	surface_num
1	mn180607-44	mn	278.1535	304	98.4	10	1.5	0.967	4	416	0.178038465169643	0.368794326241135	Initial	1	1	1
2	mn180607-44	mn	NA	10	1.5	12	1.6	0.968	0	NA	NA	NA	Middle	0	2	1
3	mn180607-44	mn	585.9165	12	1.6	22	4.1	1.067	0	1128	0.375029163312952	1	Middle	0	3	1
4	mn180607-44	mn	308.954	22	4.1	12	1.6	1.035	0	549	0.197753024743611	0.486702127659574	Middle	0	4	1
5	mn180607-44	mn	151.814	12	1.6	14	1.7	1.034	0	329	0.0971719987390568	0.291666666666667	Middle	0	5	1
6	mn180607-44	mn	233.7975	14	1.7	15	2	0.934	0	360	0.149647399944634	0.319148936170213	Middle	0	6	1
7	mn180607-44	mn	333.096	15	2	12	1.6	0.901	0	601	0.213205660162995	0.532801418439716	Middle	0	7	1
8	mn180607-44	mn	319.9245	12	1.6	11	1.3	1.068	0	541	0.20477494243346	0.479609929078014	Middle	0	8	1
9	mn180607-44	mn	195.77	11	1.3	12	1.6	0.501	0	290	0.125307034879162	0.25709219858156	Middle	0	9	1
10	mn180607-44	mn	921.9845	12	1.6	201	100	1.702	2	878	0.590137119576784	0.778368794326241	Terminal	0	10	1
11	mn180607-44	mn	147.4275	201	100	15	2.6	0.934	2	337	0.0943643197867278	0.298758865248227	Initial	1	1	2
12	mn180607-44	mn	315.3915	15	2.6	15	2.3	0.901	0	485	0.201873492828785	0.429964539007092	Middle	0	2	2
13	mn180607-44	mn	196.4265	15	2.3	13	1.6	0.868	0	363	0.125727242614761	0.321808510638298	Middle	0	3	2
14	mn180607-44	mn	415.4845	13	1.6	14	1.7	1.168	0	692	0.265940290817037	0.613475177304965	Middle	0	4	2
15	mn180607-44	mn	225.891	14	1.7	13	1.4	0.834	0	533	0.144586665045149	0.472517730496454	Middle	0	5	2
16	mn180607-44	mn	410.243	13	1.4	13	1.3	0.901	0	696	0.262585349695725	0.617021276595745	Middle	0	6	2
17	mn180607-44	mn	133.786	13	1.3	14	1.3	0.968	0	544	0.0856327678824314	0.482269503546099	Middle	0	7	2
18	mn180607-44	mn	161.6905	14	1.3	14	1.5	0.935	0	360	0.103493676881694	0.319148936170213	Middle	0	8	2
19	mn180607-44	mn	127.865	14	1.5	11	1.2	0.734	0	275	0.0818428973531393	0.243794326241135	Middle	0	9	2
20	mn180607-44	mn	108.3225	11	1.2	14	1.8	0.534	0	332	0.0693342763737961	0.294326241134752	Middle	0	10	2
21	mn180607-44	mn	602.791	14	1.8	408	106.9	2.102	0	783	0.385830070295986	0.694148936170213	Terminal	0	11	2
22	mn180607-44	mn	135.785	408	106.9	15	2.2	0.901	0	268	0.0869122732342394	0.23758865248227	Initial	1	1	3
23	mn180607-44	mn	236.4615	15	2.2	10	1	1.134	0	319	0.151352553650095	0.282801418439716	Middle	0	2	3
24	mn180607-44	mn	243.9025	10	1	13	1.4	1.135	0	236	0.156115334702022	0.209219858156028	Middle	0	3	3
25	mn180607-44	mn	212.149	13	1.4	12	1.3	1.001	0	387	0.135790785833271	0.343085106382979	Middle	0	4	3
26	mn180607-44	mn	346.9425	12	1.3	12	1.3	0.968	0	264	0.222068426973304	0.234042553191489	Middle	0	5	3
27	mn180607-44	mn	184.0375	12	1.3	22	1.4	1.034	0	260	0.117797381782571	0.230496453900709	Middle	0	6	3
28	mn180607-44	mn	164.979	22	1.4	14	1.6	0.934	0	290	0.105598555995961	0.25709219858156	Middle	0	7	3
29	mn180607-44	mn	218.682	14	1.6	17	2.1	0.868	0	439	0.139972380862466	0.389184397163121	Middle	0	8	3
30	mn180607-44	mn	159.1845	17	2.1	15	1.8	0.934	0	359	0.10188965466477	0.318262411347518	Middle	0	9	3
31	mn180607-44	mn	155.307	15	1.8	18	2.2	0.801	0	545	0.0994077727229813	0.483156028368794	Middle	0	10	3
32	mn180607-44	mn	147.1235	18	2.2	15	1.6	0.834	0	365	0.0941697376822007	0.323581560283688	Middle	0	11	3
33	mn180607-44	mn	220.4805	15	1.6	15	1.7	1.001	0	327	0.141123551635466	0.289893617021277	Middle	0	12	3
34	mn180607-44	mn	148.396	15	1.7	18	2	1.035	0	368	0.0949842302085517	0.326241134751773	Middle	0	13	3
35	mn180607-44	mn	111.598	18	2	17	2.1	0.734	0	323	0.0714308345428041	0.286347517730496	Middle	0	14	3
36	mn180607-44	mn	107.5395	17	2.1	18	1.9	0.668	0	282	0.0688330994400964	0.25	Middle	0	15	3
37	mn180607-44	mn	834.133	18	1.9	385	104.9	1.735	1	778	0.533905771695665	0.689716312056738	Terminal	0	16	3
38	mn180607-44	mn	140.723	385	104.9	15	2	1.001	1	249	0.0900729522873799	0.220744680851064	Initial	1	1	4
39	mn180607-44	mn	189.524	15	2	11	1.3	1.025	0	338	0.121309140718386	0.299645390070922	Middle	0	2	4
40	mn180607-44	mn	331.766	11	1.3	16	1.6	1.134	0	476	0.212354363455689	0.421985815602837	Middle	0	3	4
41	mn180607-44	mn	264.7395	16	1.6	36	21.9	1.201	0	422	0.169452529807386	0.374113475177305	Middle	0	4	4
42	mn180607-44	mn	644.9705	234	21.9	47	21.8	1.401	0	680	0.412828017262761	0.602836879432624	Initial	1	1	5
43	mn180607-44	mn	132.908	47	21.8	16	1.9	0.901	0	194	0.0850707840410671	0.171985815602837	Middle	0	2	5
44	mn180607-44	mn	179.9845	16	1.9	15	1.4	1.001	0	288	0.11520316707978	0.25531914893617	Middle	0	3	5
45	mn180607-44	mn	188.317	15	1.4	11	1.4	1.034	0	309	0.120536572954688	0.273936170212766	Middle	0	4	5
46	mn180607-44	mn	1108.687	11	1.4	343	37.8	1.835	0	761	0.709640295137528	0.674645390070922	Terminal	0	5	5
47	mn180607-44	mn	199.8145	343	37.8	9	1.3	0.901	0	NA	0.127895808963898	NA	Initial	1	1	6
48	mn180607-44	mn	354.534	9	1.3	8	1.1	1.135	0	475	0.226927538968427	0.421099290780142	Middle	0	2	6
49	mn180607-44	mn	320.569	8	1.1	9	1.4	1.101	0	436	0.205187469296512	0.386524822695035	Middle	0	3	6
50	mn180607-44	mn	1562.3225	9	1.4	274	103.6	1.969	2	1077	1	0.954787234042553	Terminal	0	4	6
51	mn180607-44	mn	252.867	274	103.6	16	1.5	0.9	2	499	0.161853266531078	0.442375886524823	Initial	1	1	7
52	mn180607-44	mn	379.232	16	1.5	10	1	0.967	0	575	0.242736054815827	0.509751773049645	Middle	0	2	7
53	mn180607-44	mn	329.112	10	1	10	1	0.934	0	636	0.21065561047735	0.563829787234043	Middle	0	3	7
54	mn180607-44	mn	412.969	10	1	10	1	0.968	0	648	0.264330187909346	0.574468085106383	Middle	0	4	7
55	mn180607-44	mn	380.905	10	1	11	1	1.034	0	673	0.243806896463438	0.596631205673759	Middle	0	5	7
56	mn180607-44	mn	282.2515	11	1	11	1.4	1.001	0	433	0.180661483144485	0.38386524822695	Middle	0	6	7
57	mn180607-44	mn	259.712	11	1.4	13	1.3	0.801	0	593	0.166234564246498	0.525709219858156	Middle	0	7	7
58	mn180607-44	mn	302.694	13	1.3	17	1.5	1.067	0	512	0.193746169564863	0.453900709219858	Middle	0	8	7
59	mn180607-44	mn	340.2645	17	1.5	18	2.2	0.901	0	691	0.217794021400831	0.612588652482269	Middle	0	9	7
60	mn180607-44	mn	228.251	18	2.2	20	1.9	0.934	0	414	0.146097236646083	0.367021276595745	Middle	0	10	7
61	mn180607-44	mn	1146.647	20	1.9	241	76.2	1.535	2	1121	0.733937455294921	0.993794326241135	Terminal	0	11	7
62	mn180607-44	mn	232.9975	200	100.7	13	1.5	0.934	0	409	0.149135341774826	0.36258865248227	Initial	1	1	8
63	mn180607-44	mn	665.3255	13	1.5	56	13.5	1.425	0	870	0.425856697320816	0.771276595744681	Middle	0	2	8
64	mn180607-44	mn	106.5315	56	13.5	11	1.6	1.024	0	210	0.0681879061461382	0.186170212765957	Middle	0	3	8
65	mn180607-44	mn	246.056	11	1.6	15	2.5	1.234	0	655	0.157493731287874	0.580673758865248	Middle	0	4	8
66	mn180607-44	mn	196.6465	15	2.5	10	1.4	0.901	0	407	0.125868058611458	0.360815602836879	Middle	0	5	8
67	mn180607-44	mn	489.593	10	1.4	324	101.3	1.434	0	515	0.313375119413565	0.456560283687943	Terminal	0	6	8
68	mn180607-44	mn	NA	324	101.3	9	1.5	1.268	2	NA	NA	NA	Initial	1	1	9
69	mn180607-44	mn	488.985	9	1.5	63	18.4	1.401	0	613	0.312985955204511	0.543439716312057	Middle	0	2	9
70	mn180607-44	mn	179.619	63	18.4	13	1.9	0.9	0	366	0.114969220503449	0.324468085106383	Middle	0	3	9
71	mn180607-44	mn	810.168	13	1.9	176	42.6	1.201	1	1025	0.518566429146351	0.908687943262411	Terminal	0	4	9
72	mn180607-44	mn	154.5895	176	42.6	14	1.8	0.557	1	491	0.0989485205519347	0.435283687943262	Initial	1	1	10
73	mn180607-44	mn	561.524	14	1.8	71	17.3	1.135	0	797	0.359416189679148	0.706560283687943	Middle	0	2	10
74	mn180607-44	mn	795.6825	71	17.3	263	40.2	1.301	0	920	0.509294655872907	0.815602836879433	Terminal	0	3	10
75	mn180607-44	mn	309.787	263	40.2	11	1.3	0.7	0	288	0.198286205312924	0.25531914893617	Initial	1	1	11
76	mn180607-44	mn	NA	11	1.3	9	0.6	0.867	0	417	NA	0.36968085106383	Middle	0	2	11
77	mn180607-44	mn	437.38	9	0.6	6	0.5	0.657	0	970	0.279955002888328	0.859929078014184	Middle	0	3	11
78	mn180607-44	mn	811.5995	6	0.5	321	33	1.258	0	842	0.519482693233951	0.74645390070922	Terminal	0	4	11
79	mn180607-44	mn	115.5355	321	33	11	1.1	0.3	0	NA	0.0739511208473283	NA	Initial	1	1	12
80	mn180607-44	mn	NA	11	1.1	9	1.1	0.568	0	NA	NA	NA	Middle	0	2	12
81	mn180607-44	mn	296.5085	9	1.1	11	1.1	1.035	0	579	0.189786999803178	0.513297872340426	Middle	0	3	12
82	mn180607-44	mn	101.02	11	1.1	10	1.1	0.8	0	290	0.0646601453925166	0.25709219858156	Middle	0	4	12
83	mn180607-44	mn	141.602	10	1.1	11	1	0.8	0	595	0.0906355762014565	0.527482269503546	Middle	0	5	12
84	mn180607-44	mn	NA	11	1	14	1.2	0.667	0	NA	NA	NA	Middle	0	6	12
85	mn180607-44	mn	NA	14	1.2	12	1.3	0.801	0	NA	NA	NA	Middle	0	7	12
86	mn180607-44	mn	297.543	12	1.3	13	1.1	1.001	0	474	0.190449155024011	0.420212765957447	Middle	0	8	12
87	mn180607-44	mn	152.686	13	1.1	13	1.4	0.901	0	267	0.0977301421441476	0.236702127659574	Middle	0	9	12
88	mn180607-44	mn	219.1165	13	1.4	13	1.6	0.667	0	471	0.140250492455943	0.417553191489362	Middle	0	10	12
89	mn180607-44	mn	752.6085	13	1.6	291	27.4	1.268	0	868	0.481724163865015	0.769503546099291	Terminal	0	11	12
90	mn180607-44	mn	258.942	291	27.4	11	0.9	0.901	0	480	0.165741708258058	0.425531914893617	Initial	1	1	13
91	mn180607-44	mn	244.7895	11	0.9	11	0.8	0.901	0	476	0.156683079197797	0.421985815602837	Middle	0	2	13
92	mn180607-44	mn	NA	11	0.8	11	0.9	0.967	0	NA	NA	NA	Middle	0	3	13
93	mn180607-44	mn	212.5945	11	0.9	14	1.6	0.834	0	306	0.136075938226583	0.271276595744681	Middle	0	4	13
94	mn180607-44	mn	NA	14	1.6	16	1.9	0.7	0	NA	NA	NA	Middle	0	5	13
95	mn180607-44	mn	216.9505	16	1.9	15	2	0.901	0	381	0.138864094961188	0.337765957446808	Middle	0	6	13
96	mn180607-44	mn	304.879	15	2	305	50	1.301	0	NA	0.195144728441151	NA	Terminal	0	7	13
97	mn180607-44	mn	242.783	305	50	12	1.7	1.101	0	297	0.155398773300647	0.263297872340426	Initial	1	1	14
98	mn180607-44	mn	388.1175	12	1.7	9	1.3	1.001	0	584	0.248423420900614	0.517730496453901	Middle	0	2	14
99	mn180607-44	mn	331.8145	9	1.3	271	70.5	1.301	0	NA	0.212385406982233	NA	Terminal	0	3	14
100	mn180607-44	mn	131.9815	271	70.5	12	1.5	0.801	0	321	0.0844777566731581	0.284574468085106	Initial	1	1	15
101	mn180607-44	mn	175.1615	12	1.5	12	0.6	0.634	0	529	0.11211609638855	0.468971631205674	Middle	0	2	15
102	mn180607-44	mn	602.2885	12	0.6	9	0.9	1.301	0	NA	0.385508433758075	NA	Middle	0	3	15
103	mn180607-44	mn	NA	9	0.9	11	1	0.868	0	NA	NA	NA	Middle	0	4	15
104	mn180607-44	mn	NA	11	1	9	1.2	0.9	0	NA	NA	NA	Middle	0	5	15
105	mn180607-44	mn	189.0325	9	1.2	11	1.3	0.7	0	516	0.12099454498031	0.457446808510638	Middle	0	6	15
106	mn180607-44	mn	267.431	11	1.3	12	1.5	0.935	0	478	0.171175285512434	0.423758865248227	Middle	0	7	15
107	mn180607-44	mn	298.844	12	1.5	14	1.7	1.034	0	486	0.191281889622661	0.430851063829787	Middle	0	8	15
108	mn180607-44	mn	398.173	14	1.7	10	1.3	0.901	0	680	0.254859672058746	0.602836879432624	Middle	0	9	15
109	mn180607-44	mn	1386.419	10	1.3	430	45.7	1.902	0	913	0.887408969658953	0.809397163120567	Terminal	0	10	15
110	mn180607-44	mn	110.159	430	45.7	11	1.5	0.767	0	NA	0.0705097699098618	NA	Initial	1	1	16
111	mn180607-44	mn	NA	11	1.5	10	1.1	0.867	0	NA	NA	NA	Middle	0	2	16
112	mn180607-44	mn	165.391	10	1.1	10	1.1	0.701	0	415	0.105862265953412	0.36790780141844	Middle	0	3	16
113	mn180607-44	mn	277.3755	10	1.1	12	1.1	0.9	0	501	0.177540488599505	0.444148936170213	Middle	0	4	16
114	mn180607-44	mn	162.6155	12	1.1	13	1.3	0.834	0	335	0.104085744140534	0.296985815602837	Middle	0	5	16
115	mn180607-44	mn	88.3455	13	1.3	13	1.3	0.7	0	285	0.0565475438009758	0.252659574468085	Middle	0	6	16
116	mn180607-44	mn	164.708	13	1.3	16	1.8	0.901	0	366	0.105425096290939	0.324468085106383	Middle	0	7	16
117	mn180607-44	mn	192.606	16	1.8	16	1.7	0.867	0	383	0.123281844817571	0.339539007092199	Middle	0	8	16
118	mn180607-44	mn	81.5085	16	1.7	16	1.5	0.7	0	197	0.0521713666672534	0.174645390070922	Middle	0	9	16
119	mn180607-44	mn	204.019	16	1.5	17	1.4	1.2	0	455	0.130586994682596	0.403368794326241	Middle	0	10	16
120	mn180607-44	mn	838.344	17	1.4	358	23	1.435	0	986	0.536601117886992	0.874113475177305	Terminal	0	11	16
121	mn180607-44	mn	NA	358	23	11	1.2	0.801	0	NA	NA	NA	Initial	1	1	17
122	mn180607-44	mn	464.4645	13	1.5	13	1.4	0.767	0	712	0.297291052263537	0.631205673758865	Middle	0	2	17
123	mn180607-44	mn	77.374	13	1.4	13	1.5	0.734	0	186	0.049524986038414	0.164893617021277	Middle	0	3	17
124	mn180607-44	mn	371.3345	286	21.1	14	1.3	0.667	0	504	0.237681080570753	0.446808510638298	Initial	1	1	18
125	mn180607-44	mn	148.59	14	1.3	11	0.8	1.034	0	261	0.0951084043147302	0.231382978723404	Middle	0	2	18
126	mn180607-44	mn	353.0805	13	1	14	1.2	0.834	0	481	0.225997193281157	0.426418439716312	Middle	0	3	18
127	mn180607-44	mn	102.3125	14	1.2	20	2.1	0.801	0	209	0.0654874393731128	0.185283687943262	Middle	0	4	18
128	mn180607-44	mn	468.072	341	41	14	1.4	0.901	0	832	0.299600114573015	0.737588652482269	Initial	1	1	19
129	mn180607-44	mn	228.4815	14	1.4	13	1.1	0.935	0	376	0.146244773406259	0.333333333333333	Middle	0	2	19
130	mn180607-44	mn	752.264	14	1.4	15	1.6	0.634	0	NA	0.481503658815641	NA	Middle	0	3	19
131	mn161117-10	mn	348.266	235	109.6	13	19.5	0.875	0	563	0.369173005656329	1	Initial	1	1	1
132	mn161117-10	mn	NA	13	19.5	173	104.6	1.4	1	NA	NA	NA	Terminal	0	2	1
133	mn161117-10	mn	NA	173	104.6	18	2.2	0.876	1	NA	NA	NA	Initial	1	1	2
134	mn161117-10	mn	366.853	18	2.2	16	1.7	1.167	0	409	0.38887581516439	0.726465364120782	Middle	0	2	2
135	mn161117-10	mn	260.9525	16	1.7	20	2.6	0.917	0	373	0.276617926408358	0.662522202486678	Middle	0	3	2
136	mn161117-10	mn	168.5275	20	2.6	15	2	1.084	0	266	0.178644495043292	0.47246891651865	Middle	0	4	2
137	mn161117-10	mn	738.36	15	2	335	44.3	2.127	0	475	0.782685017935737	0.843694493783304	Terminal	0	5	2
138	mn161117-10	mn	163.7435	335	44.3	13	1.7	0.793	0	287	0.173573303313235	0.509769094138544	Initial	1	1	3
139	mn161117-10	mn	618.2655	13	1.7	12	1.2	1.168	0	379	0.655381039000687	0.673179396092362	Middle	0	2	3
140	mn161117-10	mn	323.312	12	1.2	15	1.6	1.168	0	368	0.342720974211548	0.653641207815275	Middle	0	3	3
141	mn161117-10	mn	230.7955	15	1.6	17	1.6	1.001	0	266	0.244650549944454	0.47246891651865	Middle	0	4	3
142	mn161117-10	mn	327.1835	17	1.6	19	1.8	1.084	0	386	0.346824887000619	0.685612788632327	Middle	0	5	3
143	mn161117-10	mn	333.989	19	1.8	20	2.2	1.334	0	335	0.354038932844871	0.595026642984014	Middle	0	6	3
144	mn161117-10	mn	346.6925	20	2.2	16	2	1.209	0	348	0.367505045750969	0.618117229129662	Middle	0	7	3
145	mn161117-10	mn	704.2305	16	2	163	44.4	2.086	0	407	0.746506665479431	0.72291296625222	Terminal	0	8	3
146	mn161117-10	mn	NA	163	44.4	25	5.6	1	0	NA	NA	NA	Initial	1	1	4
147	mn161117-10	mn	712.539	25	5.6	462	111.2	2.043	0	493	0.755313938993055	0.875666074600355	Terminal	0	2	4
148	mn161117-10	mn	140.622	462	111.2	19	2.4	0.96	0	194	0.149063779988297	0.344582593250444	Initial	1	1	5
149	mn161117-10	mn	239.5415	19	2.4	18	2	1.1	0	NA	0.253921587333893	NA	Middle	0	2	5
150	mn161117-10	mn	479.7285	18	2	22	2.5	1.209	0	283	0.50852742514056	0.502664298401421	Middle	0	3	5
151	mn161117-10	mn	151.824	22	2.5	222	19.2	1.793	0	365	0.160938255272598	0.648312611012433	Terminal	0	4	5
152	mn161117-10	mn	223.6895	222	19.2	20	2.6	0.918	0	212	0.2371179645695	0.376554174067496	Initial	1	1	6
153	mn161117-10	mn	NA	20	2.6	14	1.9	1.043	0	268	NA	0.476021314387211	Middle	0	2	6
154	mn161117-10	mn	231.5525	14	1.9	332	86.4	2.002	2	NA	0.245452993953579	NA	Terminal	0	3	6
155	mn161117-10	mn	159.9025	332	86.4	17	2.3	1.335	2	263	0.169501721491507	0.467140319715808	Initial	1	1	7
156	mn161117-10	mn	NA	17	2.3	14	2.1	0.834	0	299	NA	0.531083481349911	Middle	0	2	7
157	mn161117-10	mn	520.5965	14	2.1	25	3.9	1.084	0	NA	0.551848801316135	NA	Middle	0	3	7
158	mn161117-10	mn	196.3335	25	3.9	13	2.2	1.585	0	476	0.208119736942529	0.845470692717584	Middle	0	4	7
159	mn161117-10	mn	NA	13	2.2	279	81.9	1.251	0	270	NA	0.479573712255773	Terminal	0	5	7
160	mn161117-10	mn	NA	279	81.9	16	2.2	1	0	NA	NA	NA	Initial	1	1	8
161	mn161117-10	mn	407.2295	16	2.2	16	1.7	1.168	0	NA	0.431676185751478	NA	Middle	0	2	8
162	mn161117-10	mn	433.7835	16	1.7	11	0.4	1.001	0	559	0.459824267942097	0.992895204262877	Middle	0	3	8
163	mn161117-10	mn	117.922	11	0.4	18	2.2	1.334	0	429	0.125001060031716	0.761989342806394	Middle	0	4	8
164	mn161117-10	mn	362.0525	18	2.2	24	2.3	0.917	0	164	0.383787132911017	0.291296625222025	Middle	0	5	8
165	mn161117-10	mn	NA	24	2.3	412	20.4	1.585	0	320	NA	0.568383658969805	Terminal	0	6	8
166	mn161117-10	mn	NA	412	20.4	17	2.3	1.084	0	NA	NA	NA	Initial	1	1	9
167	mn161117-10	mn	NA	17	2.3	18	1.7	1	0	NA	NA	NA	Middle	0	2	9
168	mn161117-10	mn	NA	18	1.7	20	1.8	1	0	NA	NA	NA	Middle	0	3	9
169	mn161117-10	mn	85.448	20	1.8	22	2.2	0.6	0	NA	0.0905775900814952	NA	Middle	0	4	9
170	mn161117-10	mn	96.839	22	2.2	20	2	0.917	0	140	0.102652411360148	0.24866785079929	Middle	0	5	9
171	mn161117-10	mn	98.5425	20	2	325	19.1	1.251	0	133	0.104458175388608	0.236234458259325	Terminal	0	6	9
172	mn161117-10	mn	NA	325	19.1	27	3.4	1.335	0	127	NA	0.225577264653641	Initial	1	1	10
173	mn161117-10	mn	65.297	27	3.4	20	2.3	0.834	0	NA	0.0692168909693778	NA	Middle	0	2	10
174	mn161117-10	mn	74.1325	20	2.3	18	2.4	0.751	0	127	0.0785828011974118	0.225577264653641	Middle	0	3	10
175	mn161117-10	mn	404.614	18	2.4	10	1.6	0.918	0	173	0.42890367279789	0.307282415630551	Middle	0	4	10
176	mn161117-10	mn	NA	10	1.6	391	113.6	2.085	0	317	NA	0.563055062166963	Terminal	0	5	10
177	mn161117-10	mn	NA	391	113.6	24	2.8	1	0	NA	NA	NA	Initial	1	1	11
178	mn161117-10	mn	153.129	24	2.8	23	2.5	0.8	0	NA	0.162321596662172	NA	Middle	0	2	11
179	mn161117-10	mn	NA	23	2.5	27	2.6	1	0	211	NA	0.374777975133215	Middle	0	3	11
180	mn161117-10	mn	184.798	27	2.6	92	4.8	1	0	NA	0.195891741080893	NA	Terminal	0	4	11
181	mn161117-10	mn	114.2675	92	4.8	51	3.8	1.334	0	244	0.12112717412505	0.433392539964476	Initial	1	1	12
182	mn161117-10	mn	379.9715	51	3.8	37	3.7	1.167	0	167	0.40278184123269	0.296625222024867	Middle	0	2	12
183	mn161117-10	mn	NA	37	3.7	228	17.6	1.835	0	303	NA	0.538188277087034	Terminal	0	3	12
184	mn161117-10	mn	454.6325	228	17.6	15	1.9	1	0	NA	0.481924869192086	NA	Initial	1	1	13
185	mn161117-10	mn	117.928	15	1.9	357	52.2	2.335	0	280	0.125007420222013	0.497335701598579	Terminal	0	2	13
186	mn161117-10	mn	279.5825	357	52.2	19	2	0.876	0	204	0.296366317280213	0.36234458259325	Initial	1	1	14
187	mn161117-10	mn	188.4295	19	2	22	2	1.084	0	321	0.199741246258088	0.570159857904085	Middle	0	2	14
188	mn161117-10	mn	448.7135	22	2	18	2.3	1.084	0	204	0.475650541464201	0.36234458259325	Middle	0	3	14
189	mn161117-10	mn	126.6855	18	2.3	328	109.2	1.585	0	403	0.134290647976187	0.715808170515098	Terminal	0	4	14
190	mn161117-10	mn	162.888	328	109.2	18	2.3	1.001	0	173	0.17266644618007	0.307282415630551	Initial	1	1	15
191	mn161117-10	mn	179.415	18	2.3	15	1.8	1.084	0	198	0.190185590352863	0.351687388987567	Middle	0	2	15
192	mn161117-10	mn	NA	15	1.8	24	2.4	1.042	0	312	NA	0.55417406749556	Middle	0	3	15
193	mn161117-10	mn	278.114	24	2.4	22	1.8	1.084	0	NA	0.294809660705048	NA	Middle	0	4	15
194	mn161117-10	mn	NA	22	1.8	27	2.5	1.168	0	333	NA	0.591474245115453	Middle	0	5	15
195	mn161117-10	mn	NA	27	2.5	311	78.6	1.584	3	NA	NA	NA	Terminal	0	6	15
196	mn161117-10	mn	62.959	311	78.6	18	2.6	0.834	3	165	0.0667385368170216	0.293072824156306	Initial	1	1	16
197	mn161117-10	mn	233.089	18	2.6	17	1.9	1.168	0	297	0.247081732685442	0.52753108348135	Middle	0	2	16
198	mn161117-10	mn	NA	17	1.9	18	1.7	0.8	0	NA	NA	NA	Middle	0	3	16
199	mn161117-10	mn	NA	18	1.7	22	2.3	1	0	NA	NA	NA	Middle	0	4	16
200	mn161117-10	mn	370.961	22	2.3	131	15.3	1.751	0	309	0.39323042545433	0.548845470692718	Terminal	0	5	16
201	mn161117-10	mn	NA	131	15.3	23	2.8	0.8	0	NA	NA	NA	Initial	1	1	17
202	mn161117-10	mn	NA	23	2.8	14	1.8	1.168	0	NA	NA	NA	Middle	0	2	17
203	mn161117-10	mn	264.577	14	1.8	22	2.2	1.334	0	293	0.28046001136354	0.520426287744227	Middle	0	3	17
204	mn161117-10	mn	267.797	22	2.2	10	1.2	1.418	0	275	0.28387331348954	0.488454706927176	Middle	0	4	17
205	mn161117-10	mn	306.332	10	1.2	317	98.6	1.918	0	250	0.324721635671339	0.44404973357016	Terminal	0	5	17
206	mn161117-10	mn	44.389	317	98.6	36	4.2	0.501	0	150	0.0470537478481356	0.266429840142096	Initial	1	1	18
207	mn161117-10	mn	NA	36	4.2	23	2.6	1.001	0	NA	NA	NA	Middle	0	2	18
208	mn161117-10	mn	429.2895	23	2.6	25	2.2	1.418	0	401	0.455060485409723	0.712255772646536	Middle	0	3	18
209	mn161117-10	mn	336.9475	25	2.2	280	20.5	1.418	0	292	0.357175036677097	0.518650088809947	Terminal	0	4	18
210	mn161117-10	mn	147.8735	280	20.5	16	1.9	1.084	0	196	0.156750599977951	0.348134991119005	Initial	1	1	19
211	mn161117-10	mn	282.309	16	1.9	19	2	1.251	0	309	0.299256493754293	0.548845470692718	Middle	0	2	19
212	mn161117-10	mn	261.486	19	2	24	2.3	1.042	0	317	0.277183453328924	0.563055062166963	Middle	0	3	19
213	mn161117-10	mn	276.875	24	2.3	25	2.3	1.001	0	236	0.29349628140874	0.419182948490231	Middle	0	4	19
214	mn161117-10	mn	NA	25	2.3	408	103.9	1.918	0	NA	NA	NA	Terminal	0	5	19
215	mn161117-10	mn	68.5825	408	103.9	15	1.7	0.668	0	144	0.0726996251727852	0.255772646536412	Initial	1	1	20
216	mn161117-10	mn	NA	15	1.7	15	1.2	0.584	0	NA	NA	NA	Middle	0	2	20
217	mn161117-10	mn	NA	15	1.2	16	1.8	1.084	0	NA	NA	NA	Middle	0	3	20
218	mn161117-10	mn	51.436	16	1.8	19	1.7	0.584	0	163	0.0545237913518372	0.289520426287744	Middle	0	4	20
219	mn161117-10	mn	447.187	19	1.7	327	76.9	2.169	0	296	0.474032403049499	0.525754884547069	Terminal	0	5	20
220	mn161117-10	mn	142.7805	327	76.9	23	2.7	0.918	0	208	0.151351858447605	0.369449378330373	Initial	1	1	21
221	mn161117-10	mn	210.581	23	2.7	25	2.7	1.084	0	265	0.223222538818361	0.470692717584369	Middle	0	2	21
222	mn161117-10	mn	312.5005	25	2.7	21	2.1	1.167	0	338	0.331260441312404	0.600355239786856	Middle	0	3	21
223	mn161117-10	mn	506.089	21	2.1	247	23	1.751	0	380	0.536470391194104	0.674955595026643	Terminal	0	4	21
224	mn161117-10	mn	115.368	247	23	41	4.9	1.001	0	163	0.122293739028672	0.289520426287744	Initial	1	1	22
225	mn161117-10	mn	NA	41	4.9	14	1.3	0.417	0	NA	NA	NA	Middle	0	2	22
226	mn161117-10	mn	108.099	14	1.3	26	3.3	1.293	0	225	0.114588368483985	0.399644760213144	Middle	0	3	22
227	mn161117-10	mn	340.2255	26	3.3	291	98	1.584	0	336	0.360649820642634	0.596802841918295	Terminal	0	4	22
228	mn161117-10	mn	NA	291	98	17	2.4	0.834	0	NA	NA	NA	Initial	1	1	23
229	mn161117-10	mn	NA	17	2.4	15	1.7	0.834	0	NA	NA	NA	Middle	0	2	23
230	mn161117-10	mn	NA	15	1.7	18	1.8	0.751	0	NA	NA	NA	Middle	0	3	23
231	mn161117-10	mn	159.17	18	1.8	28	2.6	1.168	0	201	0.168725248259428	0.357015985790409	Middle	0	4	23
232	mn161117-10	mn	371.52	28	2.6	68	16.8	1.584	0	325	0.393822983183657	0.577264653641208	Middle	0	5	23
233	mn161117-10	mn	71.101	68	16.8	23	2.3	0.834	0	125	0.0753693150499063	0.22202486678508	Middle	0	6	23
234	mn161117-10	mn	117.672	23	2.3	24	2.8	0.917	0	195	0.124736052102679	0.346358792184725	Middle	0	7	23
235	mn161117-10	mn	356.0235	24	2.8	221	121.8	1.835	0	353	0.377396201694355	0.626998223801066	Terminal	0	8	23
236	mn161117-10	mn	NA	216	113.5	20	3.1	0.667	1	NA	NA	NA	Initial	1	1	24
237	mn161117-10	mn	119.4385	20	3.1	17	2.9	1.167	1	150	0.126608598129256	0.266429840142096	Middle	0	2	24
238	mn161117-10	mn	221.0095	17	2.9	30	6.3	1.585	0	223	0.234277079570221	0.396092362344583	Middle	0	3	24
239	mn161117-10	mn	340.324	30	6.3	15	1.7	1.334	0	358	0.360754233766674	0.635879218472469	Middle	0	4	24
240	mn161117-10	mn	943.368	15	1.7	294	117	2.669	0	542	1	0.962699822380107	Terminal	0	5	24
241	mn161117-10	mn	131.169	294	117	13	1.7	0.751	0	254	0.139043300175541	0.451154529307282	Initial	1	1	25
242	mn161117-10	mn	343.1285	13	1.7	11	1.3	1.251	0	341	0.363727092714614	0.605683836589698	Middle	0	2	25
243	mn161117-10	mn	NA	11	1.3	12	1.7	1.168	0	NA	NA	NA	Middle	0	3	25
244	mn161117-10	mn	637.3925	12	1.7	163	100.4	2.002	0	456	0.675656265635468	0.809946714031972	Terminal	0	4	25
245	mn161117-10	mn	NA	163	100.4	14	2.4	NA	0	NA	NA	NA	Initial	1	1	26
246	mn161117-10	mn	NA	14	2.4	15	2.1	NA	0	NA	NA	NA	Middle	0	2	26
247	mn161117-10	mn	NA	15	2.1	188	104	NA	0	NA	NA	NA	Terminal	0	3	26
248	mn161117-10	mn	NA	188	107.8	11	2	NA	0	NA	NA	NA	Initial	1	1	27
249	mn161117-10	mn	NA	11	2	203	104.7	NA	1	NA	NA	NA	Terminal	0	2	27
250	mn161117-10	mn	NA	203	104.7	8	1.5	0.625	1	NA	NA	NA	Initial	1	1	28
251	mn161117-10	mn	600.9485	8	1.5	187	109.8	2.168	0	405	0.637024469772136	0.719360568383659	Terminal	0	2	28
252	mn161117-10	mn	NA	187	109.8	16	2.4	NA	0	NA	NA	NA	Initial	1	1	29
253	mn161117-10	mn	NA	16	2.4	14	1.6	NA	0	NA	NA	NA	Middle	0	2	29
254	mn161117-10	mn	NA	14	1.6	13	1.8	NA	0	NA	NA	NA	Middle	0	3	29
255	mn161117-10	mn	294.7905	13	1.8	186	114.9	1.584	0	233	0.312487279619406	0.413854351687389	Terminal	0	4	29
256	mn161117-10	mn	146.1105	186	114.9	16	2.2	0.917	0	208	0.154881764062381	0.369449378330373	Initial	1	1	30
257	mn161117-10	mn	183.766	16	2.2	17	2.3	0.834	0	330	0.194797788349827	0.586145648312611	Middle	0	2	30
258	mn161117-10	mn	225.6805	17	2.3	21	2.5	1.001	0	301	0.239228487716352	0.534635879218472	Middle	0	3	30
259	mn161117-10	mn	293.1695	21	2.5	154	35.9	1.501	0	254	0.310768968207529	0.451154529307282	Terminal	0	4	30
260	mn161117-10	mn	223.167	154	35.9	19	3	1.584	0	240	0.236564097997812	0.426287744227353	Initial	1	1	31
261	mn161117-10	mn	187.899	19	3	25	2.4	2.419	0	259	0.199178899432671	0.460035523978686	Middle	0	2	31
262	mn161117-10	mn	276.5985	25	2.4	19	2.1	1.285	0	273	0.293203182639225	0.484902309058615	Middle	0	3	31
263	mn161117-10	mn	NA	19	2.1	177	107.1	1.835	1	NA	NA	NA	Terminal	0	4	31
264	mn161117-10	mn	97.2335	177	107.1	15	2.2	1	1	137	0.103070593872169	0.243339253996448	Initial	1	1	32
265	mn161117-10	mn	166.0815	15	2.2	12	1.7	0.834	0	278	0.176051657465591	0.493783303730018	Middle	0	2	32
266	mn161117-10	mn	255.392	12	1.7	12	2.1	1.168	0	291	0.270723620050712	0.516873889875666	Middle	0	3	32
267	mn161117-10	mn	576.8065	12	2.1	167	104.5	2.118	0	412	0.611433184080868	0.731793960923623	Terminal	0	4	32
268	mn161117-10	mn	165.5055	167	104.5	5	1.1	1.084	0	217	0.17544107919709	0.385435168738899	Initial	1	1	33
269	mn161117-10	mn	412.7665	5	1.1	162	108.1	1.835	0	361	0.437545581363794	0.641207815275311	Terminal	0	2	33
270	mn161117-10	mn	NA	162	108.1	14	2.7	1.016	0	NA	NA	NA	Initial	1	1	34
271	mn161117-10	mn	607.396	14	2.7	149	101.5	2.085	2	404	0.643859024262006	0.717584369449378	Terminal	0	2	34
272	mn161117-10	mn	59.9525	149	101.5	15	2.1	0.834	2	103	0.0635515514624198	0.182948490230906	Initial	1	1	35
273	mn161117-10	mn	244.1775	15	2.1	12	1.7	1.001	0	NA	0.25883589436996	NA	Middle	0	2	35
274	bb190228-55b	bb	226.7385	224	135.5	22	3.6	0.701	0	485	0.377851842902316	0.627425614489004	Initial	1	1	1
275	bb190228-55b	bb	213.786	22	3.6	22	2.8	0.634	0	414	0.356266951076745	0.535575679172057	Middle	0	2	1
276	bb190228-55b	bb	249.229	22	2.8	24	3.1	0.801	0	430	0.415331480779406	0.55627425614489	Middle	0	3	1
277	bb190228-55b	bb	206.9355	24	3.1	24	2.6	0.801	0	390	0.344850830524645	0.504527813712807	Middle	0	4	1
278	bb190228-55b	bb	367.083	24	2.6	228	118.6	0.801	1	687	0.611731082494199	0.888745148771022	Terminal	0	5	1
279	bb190228-55b	bb	196.5355	228	118.6	10	1.4	0.734	1	365	0.327519591382708	0.472186287192756	Initial	1	1	2
280	bb190228-55b	bb	199.07	10	1.4	11	1.4	0.734	0	375	0.331743247690904	0.485122897800776	Middle	0	2	2
281	bb190228-55b	bb	184.5515	11	1.4	17	1.8	0.667	0	389	0.30754867120223	0.503234152652005	Middle	0	3	2
282	bb190228-55b	bb	211.6035	17	1.8	38	2.8	0.801	0	386	0.352629890554891	0.499353169469599	Middle	0	4	2
283	bb190228-55b	bb	202.273	38	2.8	20	2.5	0.667	0	401	0.33708093605356	0.51875808538163	Middle	0	5	2
284	bb190228-55b	bb	493.1295	20	2.5	325	250	0.868	2	707	0.821783201196522	0.914618369987063	Terminal	0	6	2
285	bb190228-55b	bb	271.878	276	133	14	2.1	0.734	2	491	0.45307525340688	0.635187580853816	Initial	1	1	3
286	bb190228-55b	bb	275.321	14	2.1	13	1.6	0.734	0	494	0.458812893442042	0.639068564036222	Middle	0	2	3
287	bb190228-55b	bb	285.1815	13	1.6	17	1.7	0.801	0	442	0.475245074553492	0.571798188874515	Middle	0	3	3
288	bb190228-55b	bb	302.4815	17	1.7	39	6.7	0.767	0	468	0.504074924279983	0.605433376455369	Middle	0	4	3
289	bb190228-55b	bb	286.75	39	6.7	88	7.5	0.734	0	499	0.47785892537985	0.645536869340233	Middle	0	5	3
290	bb190228-55b	bb	250.8805	88	7.5	25	3.4	0.734	0	427	0.418083648225839	0.552393272962484	Middle	0	6	3
291	bb190228-55b	bb	231.648	25	3.4	28	4.3	0.601	0	498	0.386033354303022	0.644243208279431	Middle	0	7	3
292	bb190228-55b	bb	524.3935	28	4.3	197	121.1	0.867	6	741	0.873883572401668	0.958602846054334	Terminal	0	8	3
293	bb190228-55b	bb	324.8765	197	121.1	16	5.1	0.734	6	632	0.541395414720721	0.817593790426908	Initial	1	1	4
294	bb190228-55b	bb	239.417	16	5.1	17	1.4	0.734	0	454	0.398980123235109	0.58732212160414	Middle	0	2	4
295	bb190228-55b	bb	207.4915	17	1.4	18	1.8	0.601	0	495	0.345777385232618	0.640362225097025	Middle	0	3	4
296	bb190228-55b	bb	183.3185	18	1.8	18	2	0.734	0	423	0.305493919484729	0.547218628719276	Middle	0	4	4
297	bb190228-55b	bb	210.516	18	2	18	1.8	0.601	0	480	0.350817609538847	0.620957309184993	Middle	0	5	4
298	bb190228-55b	bb	246.861	18	1.8	17	2.1	0.7	0	512	0.411385290944011	0.66235446313066	Middle	0	6	4
299	bb190228-55b	bb	505.467	17	2.1	221	123.2	0.934	7	773	0.842343216861296	1	Terminal	0	7	4
300	bb190228-55b	bb	219.8275	221	123.2	17	3	0.667	7	NA	0.366334901199438	NA	Initial	1	1	5
301	bb190228-55b	bb	228.233	17	3	14	2	0.667	0	468	0.380342375296318	0.605433376455369	Middle	0	2	5
302	bb190228-55b	bb	235.7695	14	2	15	2	0.668	0	434	0.392901691045665	0.561448900388098	Middle	0	3	5
303	bb190228-55b	bb	284.1475	15	2	14	1.6	0.734	0	420	0.47352194943111	0.543337645536869	Middle	0	4	5
304	bb190228-55b	bb	239.8245	14	1.6	26	2.3	0.667	0	439	0.399659207845719	0.567917205692109	Middle	0	5	5
305	bb190228-55b	bb	306.738	26	2.3	20	2	0.734	0	590	0.511168233838411	0.763260025873221	Middle	0	6	5
306	bb190228-55b	bb	600.0725	20	2	240	140.6	0.968	7	763	1	0.987063389391979	Terminal	0	7	5
307	bb190228-55b	bb	226.6205	240	140.6	21	3.3	0.567	7	555	0.377655199996667	0.717981888745149	Initial	1	1	6
308	bb190228-55b	bb	310.2005	21	3.3	16	3.2	0.735	0	617	0.516938369946965	0.798188874514877	Middle	0	2	6
309	bb190228-55b	bb	157.6445	16	3.2	15	1.9	0.682	0	326	0.262709089318374	0.421733505821475	Middle	0	3	6
310	bb190228-55b	bb	255.747	15	1.9	26	2.3	0.934	0	349	0.426193501618554	0.451487710219922	Middle	0	4	6
311	bb190228-55b	bb	182.973	26	2.3	18	2.1	0.734	0	411	0.30491815572285	0.531694695989651	Middle	0	5	6
312	bb190228-55b	bb	209.535	18	2.1	25	1.8	0.767	0	407	0.349182807077478	0.526520051746442	Middle	0	6	6
313	bb190228-55b	bb	191.145	25	1.8	21	1.2	0.668	0	375	0.318536510171688	0.485122897800776	Middle	0	7	6
314	bb190228-55b	bb	NA	21	1.2	12	1	1.067	0	NA	NA	NA	Middle	0	8	6
315	bb190228-55b	bb	168.902	12	1	14	1.4	0.634	0	356	0.28146932245687	0.460543337645537	Middle	0	9	6
316	bb190228-55b	bb	394.049	14	1.4	325	201.7	0.834	3	642	0.656668985830879	0.830530401034929	Terminal	0	10	6
317	bb190228-55b	bb	220.3515	325	201.7	18	2.6	0.734	3	501	0.367208129017744	0.648124191461837	Initial	1	1	7
318	bb190228-55b	bb	168.9115	18	2.6	17	4.6	0.7	0	NA	0.28148515387724	NA	Middle	0	2	7
319	bb190228-55b	bb	204.7475	17	4.6	16	1.4	0.634	0	443	0.34120460444363	0.573091849935317	Middle	0	3	7
320	bb190228-55b	bb	233.8295	16	1.4	24	1.4	0.701	0	502	0.389668748359573	0.649417852522639	Middle	0	4	7
321	bb190228-55b	bb	220.299	24	1.4	25	2	0.734	0	NA	0.367120639589383	NA	Middle	0	5	7
322	bb190228-55b	bb	207.2555	25	2	159	5.3	0.768	0	362	0.34538409942132	0.468305304010349	Terminal	0	6	7
323	bb190228-55b	bb	NA	298	118.2	22	4.2	0.934	6	NA	NA	NA	Initial	1	1	8
324	bb190228-55b	bb	162.2735	22	4.2	7	NA	0.634	0	371	0.270423157201838	0.479948253557568	Middle	0	2	8
325	bb190228-55b	bb	158.461	7	NA	17	2.3	0.701	0	283	0.264069758237546	0.366106080206986	Middle	0	3	8
326	bb190228-55b	bb	149.9745	17	2.3	21	2.7	0.567	0	340	0.249927300451195	0.439844760672704	Middle	0	4	8
327	bb190228-55b	bb	200.2255	21	2.7	21	3	0.734	0	385	0.333668848347491	0.498059508408797	Middle	0	5	8
328	bb190228-55b	bb	168.285	21	3	18	2.4	0.7	0	NA	0.280441113365468	NA	Middle	0	6	8
329	bb190228-55b	bb	337.5625	18	2.4	215	106.8	0.901	5	514	0.56253619354328	0.664941785252264	Terminal	0	7	8
330	bb190228-55b	bb	160.0625	215	106.8	19	1.5	0.7	5	317	0.266738602418874	0.410090556274256	Initial	1	1	9
331	bb190228-55b	bb	145.3545	19	1.5	17	1.9	0.567	0	332	0.24222823075545	0.429495472186287	Middle	0	2	9
332	bb190228-55b	bb	201.732	17	1.9	11	1.5	0.701	0	406	0.336179378325119	0.52522639068564	Middle	0	3	9
333	bb190228-55b	bb	181.4965	11	1.5	12	1.8	0.633	0	367	0.302457619704286	0.47477360931436	Middle	0	4	9
334	bb190228-55b	bb	144.1675	12	1.8	12	1.3	0.667	0	274	0.240250136441847	0.354463130659767	Middle	0	5	9
335	bb190228-55b	bb	301.2115	12	1.3	206	125.3	0.901	7	452	0.501958513346304	0.584734799482536	Terminal	0	6	9
336	bb190228-55b	bb	189.499	206	125.3	13	NA	0.701	7	380	0.315793508284416	0.491591203104787	Initial	1	1	10
337	bb190228-55b	bb	196.9705	13	NA	11	1.5	0.701	0	439	0.328244503789125	0.567917205692109	Middle	0	2	10
338	bb190228-55b	bb	131.8545	11	1.5	12	1.3	0.6	0	305	0.219730949176974	0.394566623544631	Middle	0	3	10
339	bb190228-55b	bb	160.818	12	1.3	12	1.5	0.667	0	318	0.267997616954618	0.411384217335058	Middle	0	4	10
340	bb190228-55b	bb	192.6395	12	1.5	19	1.8	0.601	0	445	0.32102704256569	0.575679172056921	Middle	0	5	10
341	bb190228-55b	bb	165.5775	19	1.8	33	1.4	0.668	0	335	0.275929158560007	0.433376455368693	Middle	0	6	10
342	bb190228-55b	bb	155.6695	33	1.4	14	1.5	0.567	0	402	0.259417820346708	0.520051746442432	Middle	0	7	10
343	bb190228-55b	bb	381.671	14	1.5	217	137.9	0.901	8	542	0.636041478321369	0.701164294954722	Terminal	0	8	10
344	bb190228-55b	bb	211.317	217	137.9	15	2.4	0.634	8	458	0.352152448245837	0.592496765847348	Initial	1	1	11
345	bb190228-55b	bb	191.8625	15	2.4	12	1.6	0.634	0	397	0.319732199025951	0.513583441138422	Middle	0	2	11
346	bb190228-55b	bb	171.775	12	1.6	11	1.3	0.601	0	367	0.28625707726983	0.47477360931436	Middle	0	3	11
347	bb190228-55b	bb	165.397	11	1.3	17	1.6	0.667	0	312	0.275628361572977	0.403622250970246	Middle	0	4	11
348	bb190228-55b	bb	201.018	17	1.6	17	1.6	0.668	0	399	0.334989522099413	0.516170763260026	Middle	0	5	11
349	bb190228-55b	bb	129.0625	17	1.6	13	1.3	0.634	0	257	0.215078178053485	0.332470892626132	Middle	0	6	11
350	bb190228-55b	bb	138.1755	13	1.3	18	1.7	0.7	0	271	0.230264676351608	0.350582147477361	Middle	0	7	11
351	bb190228-55b	bb	136.3975	18	1.7	16	1.5	0.601	0	299	0.227301701044457	0.386804657179819	Middle	0	8	11
352	bb190228-55b	bb	338.8675	16	1.5	227	148.4	0.934	7	501	0.564710930762533	0.648124191461837	Terminal	0	9	11
353	bb190228-55b	bb	169.2935	227	148.4	14	2.1	0.274	7	339	0.282121743622646	0.438551099611902	Initial	1	1	12
354	bb190228-55b	bb	199.417	14	2.1	13	1.5	0.7	0	365	0.332321511150736	0.472186287192756	Middle	0	2	12
355	bb190228-55b	bb	NA	13	1.5	12	1.5	0.667	0	NA	NA	NA	Middle	0	3	12
356	bb190228-55b	bb	158.278	12	1.5	16	1.9	0.667	0	327	0.26376479508726	0.423027166882277	Middle	0	4	12
357	bb190228-55b	bb	157.7055	16	1.9	17	1.5	0.668	0	320	0.262810743701803	0.413971539456662	Middle	0	5	12
358	bb190228-55b	bb	204.663	17	1.5	19	1.7	0.667	0	386	0.341063788125602	0.499353169469599	Middle	0	6	12
359	bb190228-55b	bb	185.292	19	1.7	23	1.7	0.667	0	351	0.308782688758442	0.454075032341527	Middle	0	7	12
360	bb190228-55b	bb	151.197	23	1.7	22	1.9	0.668	0	299	0.251964554283024	0.386804657179819	Middle	0	8	12
361	bb190228-55b	bb	172.119	22	1.9	18	1.7	0.768	0	279	0.286830341333756	0.360931435963777	Middle	0	9	12
362	bb190228-55b	bb	NA	18	1.7	15	1.2	0.734	0	NA	NA	NA	Middle	0	10	12
363	bb190228-55b	bb	306.5845	15	1.2	236	83.8	1.068	4	377	0.510912431414537	0.48771021992238	Terminal	0	11	12
364	bb190228-55b	bb	155.4435	236	83.8	16	2.2	0.701	4	297	0.259041199188431	0.384217335058215	Initial	1	1	13
365	bb190228-55b	bb	183.1405	16	2.2	13	1.2	0.791	0	346	0.305197288660953	0.447606727037516	Middle	0	2	13
366	bb190228-55b	bb	185.2345	13	1.2	13	1.6	0.701	0	376	0.30868686700357	0.486416558861578	Middle	0	3	13
367	bb190228-55b	bb	164.7185	13	1.6	14	1.4	0.6	0	360	0.274497664865495	0.465717981888745	Middle	0	4	13
368	bb190228-55b	bb	162.86	14	1.4	14	1.3	0.634	0	376	0.271400539101525	0.486416558861578	Middle	0	5	13
369	bb190228-55b	bb	187.228	14	1.3	18	1.6	0.634	0	419	0.312008965583325	0.542043984476067	Middle	0	6	13
370	bb190228-55b	bb	360.496	18	1.6	215	113.7	0.934	5	469	0.600754075549204	0.606727037516171	Terminal	0	7	13
371	bb190228-55b	bb	160.726	215	113.7	12	1.2	0.834	5	315	0.267844302146824	0.407503234152652	Initial	1	1	14
372	bb190228-55b	bb	255.853	12	1.2	8	0.8	0.734	0	440	0.426370146940578	0.569210866752911	Middle	0	2	14
373	bb190228-55b	bb	202.8235	8	0.8	11	1	0.634	0	445	0.337998325202371	0.575679172056921	Middle	0	3	14
374	bb190228-55b	bb	163.711	11	1	11	1	0.6	0	356	0.27281870107362	0.460543337645537	Middle	0	4	14
375	bb190228-55b	bb	206.879	11	1	13	1.1	0.634	0	427	0.344756675235076	0.552393272962484	Middle	0	5	14
376	bb190228-55b	bb	203.7275	13	1.1	14	1.4	0.668	0	404	0.339504809835478	0.522639068564036	Middle	0	6	14
377	bb190228-55b	bb	125.7995	14	1.4	19	0.8	0.6	0	277	0.209640501772702	0.358344113842173	Middle	0	7	14
378	bb190228-55b	bb	164.413	19	0.8	17	1.2	0.6	0	368	0.273988559715701	0.476067270375162	Middle	0	8	14
379	bb190228-55b	bb	563.857	17	1.2	195	146.4	1.001	6	739	0.93964812585146	0.95601552393273	Terminal	0	9	14
380	bb190228-55b	bb	211.714	195	146.4	16	2.2	0.634	6	426	0.352814034970774	0.551099611901682	Initial	1	1	15
381	bb190228-55b	bb	160.5155	16	2.2	18	2.2	0.701	0	300	0.26749351120073	0.388098318240621	Middle	0	2	15
382	bb190228-55b	bb	137.942	18	2.2	25	2.1	0.634	0	307	0.229875556703565	0.397153945666235	Middle	0	3	15
383	bb190228-55b	bb	NA	25	2.1	19	1.7	0.667	0	NA	NA	NA	Middle	0	4	15
384	bb190228-55b	bb	194.191	19	1.7	15	1.4	0.734	0	348	0.323612563481913	0.45019404915912	Middle	0	5	15
385	bb190228-55b	bb	399.13	15	1.4	163	NA	0.634	8	586	0.665136296030896	0.758085381630013	Terminal	0	6	15
386	bb190228-55b	bb	175.705	246	130.49	10	1.6	0.801	5	321	0.29280628590712	0.415265200517464	Initial	1	1	16
387	bb190228-55b	bb	NA	10	1.6	6	0.6	0.734	0	NA	NA	NA	Middle	0	2	16
388	bb190228-55b	bb	NA	6	0.6	12	1	0.667	0	NA	NA	NA	Middle	0	3	16
389	bb190228-55b	bb	NA	12	1	11	1.1	0.734	0	NA	NA	NA	Middle	0	4	16
390	bb190228-55b	bb	NA	11	1.1	16	1.3	0.668	0	NA	NA	NA	Middle	0	5	16
391	bb190228-55b	bb	471.2675	16	1.3	199	149	0.867	7	666	0.785350936761808	0.861578266494179	Terminal	0	6	16
392	bb190228-55b	bb	233.6805	199	149	13	2.2	0.801	7	385	0.389420445029559	0.498059508408797	Initial	1	1	17
393	bb190228-55b	bb	NA	13	2.2	9	1.1	0.801	0	NA	NA	NA	Middle	0	2	17
394	bb190228-55b	bb	NA	9	1.1	11	0.7	0.6	1	NA	NA	NA	Middle	0	3	17
395	bb190228-55b	bb	NA	11	0.7	13	1	1.001	2	NA	NA	NA	Middle	0	4	17
396	bb190228-55b	bb	NA	13	1	26	1.3	1.134	3	NA	NA	NA	Middle	0	5	17
397	bb190228-55b	bb	419.4255	26	1.3	225	133.8	1.001	8	608	0.698958042569856	0.786545924967659	Terminal	0	6	17
398	bb190228-55b	bb	218.038	225	133.8	14	1.6	0.801	8	409	0.363352761541314	0.529107373868047	Initial	1	1	18
399	bb190228-55b	bb	NA	14	1.6	11	1.1	0.667	0	NA	NA	NA	Middle	0	2	18
400	bb190228-55b	bb	NA	11	1.1	14	1.6	0.801	0	NA	NA	NA	Middle	0	3	18
401	bb190228-55b	bb	NA	14	1.6	12	1.8	0.867	0	NA	NA	NA	Middle	0	4	18
402	bb190228-55b	bb	NA	12	1.8	14	1.2	0.734	0	NA	NA	NA	Middle	0	5	18
403	bb190228-55b	bb	NA	14	1.2	19	1.6	0.868	0	NA	NA	NA	Middle	0	6	18
404	bb190228-55b	bb	NA	19	1.6	233	148.9	0.801	6	NA	NA	NA	Terminal	0	7	18
405	bb190228-55b	bb	235.4455	233	148.9	14	2	0.734	6	412	0.392361756287782	0.532988357050453	Initial	1	1	19
406	bb190228-55b	bb	503.723	15	0.8	228	144.7	1.001	8	710	0.839436901374417	0.91849935316947	Terminal	0	2	19
407	bb190228-55b	bb	250.4085	228	144.7	15	2	0.734	8	414	0.417297076603244	0.535575679172057	Initial	1	1	20
408	bb190228-55b	bb	521.214	17	0.9	236	162.7	0.935	10	713	0.868585045973612	0.922380336351876	Terminal	0	2	20
409	bb190228-55b	bb	198.794	236	162.7	10	1.5	0.734	10	360	0.331283303267522	0.465717981888745	Initial	1	1	21
410	bb190228-55b	bb	497.8735	10	1.8	315	172.18	0.935	12	NA	0.829688912589729	NA	Terminal	0	2	21
411	bb190309-52	bb	NA	376	196.82	22	2.6	0.467	5	NA	NA	NA	Initial	1	1	1
412	bb190309-52	bb	64.027	22	2.6	12	1.9	0.567	0	196	0.350792511546617	0.442437923250564	Middle	0	2	1
413	bb190309-52	bb	NA	12	1.9	10	1.8	0.567	0	NA	NA	NA	Middle	0	3	1
414	bb190309-52	bb	62.8715	10	1.8	25	3.5	0.534	0	221	0.34446173317043	0.498871331828442	Middle	0	4	1
415	bb190309-52	bb	20.7845	25	3.5	30	4.1	0.4	0	95	0.113874567857945	0.214446952595937	Middle	0	5	1
416	bb190309-52	bb	42.569	30	4.1	119	5.8	0.534	0	120	0.233227957330937	0.270880361173815	Terminal	0	6	1
417	bb190309-52	bb	73.4355	119	5.8	19	2.3	0.534	0	191	0.402340004711787	0.431151241534989	Initial	1	1	2
418	bb190309-52	bb	34.966	19	2.3	41	4.9	0.468	0	118	0.191572476591735	0.266365688487585	Middle	0	2	2
419	bb190309-52	bb	182.521	41	4.9	407	124.7	0.734	5	416	1	0.939051918735892	Terminal	0	3	2
420	bb190309-52	bb	105.953	407	124.7	13	1	0.667	5	213	0.580497586579079	0.480812641083521	Initial	1	1	3
421	bb190309-52	bb	NA	13	1	10	0.7	0.4	0	NA	NA	NA	Middle	0	2	3
422	bb190309-52	bb	121.853	10	0.7	7	0.4	0.801	0	291	0.667610850258326	0.656884875846501	Middle	0	3	3
423	bb190309-52	bb	64.1475	7	0.4	9	0.6	0.734	0	130	0.35145270955123	0.293453724604966	Middle	0	4	3
424	bb190309-52	bb	63.306	9	0.6	12	0.8	0.6	0	163	0.346842281162168	0.367945823927765	Middle	0	5	3
425	bb190309-52	bb	72.3095	12	0.8	17	1.1	0.734	0	149	0.396170851573244	0.336343115124153	Middle	0	6	3
426	bb190309-52	bb	119.039	17	1.1	9	1.6	0.801	0	223	0.652193446233584	0.503386004514673	Middle	0	7	3
427	bb190309-52	bb	76.1845	9	1.6	322	110	0.534	3	243	0.417401285331551	0.548532731376975	Terminal	0	8	3
428	bb190309-52	bb	30.7915	322	110	16	2.4	0.333	3	141	0.168701135759721	0.318284424379232	Initial	1	1	4
429	bb190309-52	bb	124.3965	16	2.4	98	5.7	0.734	0	239	0.681546233036199	0.539503386004515	Terminal	0	2	4
430	bb190309-52	bb	49.6215	98	5.7	24	2.9	0.534	0	142	0.271867346771057	0.320541760722348	Initial	1	1	5
431	bb190309-52	bb	42.9025	24	2.9	26	4.4	0.434	0	168	0.235055144339555	0.379232505643341	Middle	0	2	5
432	bb190309-52	bb	19.2015	26	4.4	14	1.7	0.334	0	88	0.105201593241326	0.198645598194131	Middle	0	3	5
433	bb190309-52	bb	96.5935	14	1.7	510	191.72	0.634	0	254	0.529218555673046	0.573363431151242	Terminal	0	4	5
434	bb190309-52	bb	21.1395	510	191.72	11	0.6	0.334	0	101	0.115819549531287	0.227990970654628	Initial	1	1	6
435	bb190309-52	bb	36.6255	11	0.6	10	0.5	0.434	0	131	0.200664581061905	0.295711060948081	Middle	0	2	6
436	bb190309-52	bb	34.4175	10	0.5	9	0.4	0.6	0	90	0.188567342935881	0.203160270880361	Middle	0	3	6
437	bb190309-52	bb	67.2455	9	0.4	17	0.5	0.567	0	182	0.368426098914646	0.410835214446953	Middle	0	4	6
438	bb190309-52	bb	86.886	17	0.5	21	1.3	0.667	0	183	0.476032894844977	0.413092550790068	Middle	0	5	6
439	bb190309-52	bb	29.6855	21	1.3	23	2.1	0.601	0	79	0.162641559053479	0.178329571106095	Middle	0	6	6
440	bb190309-52	bb	83.6355	23	2.1	19	2	0.701	0	179	0.458223985185266	0.404063205417607	Middle	0	7	6
441	bb190309-52	bb	84.3085	19	2	17	2	0.667	0	202	0.461911232132193	0.455981941309255	Middle	0	8	6
442	bb190309-52	bb	110.3155	17	2	407	195.6	0.6	7	415	0.604398945874721	0.936794582392777	Terminal	0	9	6
443	bb190309-52	bb	7.555	407	195.6	14	1.4	0.201	7	69	0.0413924973016804	0.155756207674944	Initial	1	1	7
444	bb190309-52	bb	109.37	14	1.4	12	1.1	0.667	0	343	0.599218720037694	0.774266365688488	Middle	0	2	7
445	bb190309-52	bb	77.6985	12	1.1	12	1	0.601	0	289	0.425696221256732	0.652370203160271	Middle	0	3	7
446	bb190309-52	bb	55.5925	12	1	11	1	0.434	0	236	0.304581390634502	0.532731376975169	Middle	0	4	7
447	bb190309-52	bb	12.462	11	1	13	0.9	0.267	0	97	0.0682770749667162	0.218961625282167	Middle	0	5	7
448	bb190309-52	bb	76.4365	13	0.9	333	195	0.601	7	191	0.418781948378543	0.431151241534989	Terminal	0	6	7
449	bb190309-52	bb	8.588	333	195	15	1.5	0.167	7	70	0.0470521200300239	0.158013544018059	Initial	1	1	8
450	bb190309-52	bb	43.877	15	1.5	13	1.3	0.401	0	165	0.240394256003419	0.372460496613995	Middle	0	2	8
451	bb190309-52	bb	111.8515	13	1.3	12	1.1	0.501	0	381	0.612814415875434	0.860045146726862	Middle	0	3	8
452	bb190309-52	bb	69.761	12	1.1	12	1.5	0.501	0	285	0.382208074687296	0.64334085778781	Middle	0	4	8
453	bb190309-52	bb	71.718	12	1.5	10	1.2	0.567	0	268	0.392930128587943	0.604966139954853	Middle	0	5	8
454	bb190309-52	bb	113.155	10	1.2	26	2.4	0.667	0	443	0.619956059850647	1	Middle	0	6	8
455	bb190309-52	bb	34.7685	26	2.4	48	4.7	0.4	0	157	0.190490409322763	0.354401805869074	Middle	0	7	8
456	bb190309-52	bb	33.0755	48	4.7	18	3	0.3	0	126	0.181214764328488	0.284424379232506	Middle	0	8	8
457	bb190309-52	bb	53.095	18	3	22	2.4	0.568	0	197	0.290898033650922	0.444695259593679	Middle	0	9	8
458	bb190309-52	bb	142.975	22	2.4	562	213.27	0.767	3	365	0.78333452041135	0.82392776523702	Terminal	0	10	8
459	bb190309-52	bb	20.793	471	236.27	13	1.1	0.3	7	144	0.113921137841673	0.325056433408578	Initial	1	1	9
460	bb190309-52	bb	14.9595	13	1.1	10	0.7	0.233	0	94	0.0819604319502961	0.212189616252822	Middle	0	2	9
461	bb190309-52	bb	6.891	10	0.7	9	0.8	0.134	0	80	0.0377545597492891	0.18058690744921	Middle	0	3	9
462	bb190309-52	bb	34.193	9	0.8	9	0.5	0.434	0	114	0.187337347483303	0.257336343115124	Middle	0	4	9
463	bb190309-52	bb	26.5165	9	0.5	11	1	0.301	0	125	0.145279173355395	0.282167042889391	Middle	0	5	9
464	bb190309-52	bb	26.597	11	1	13	NA	0.333	0	137	0.145720218495406	0.309255079006772	Middle	0	6	9
465	bb190309-52	bb	24.771	13	0.9	34	3.3	0.334	0	95	0.13571589022633	0.214446952595937	Middle	0	7	9
466	bb190309-52	bb	8.626	34	3.3	22	1	0.234	0	52	0.0472603152513957	0.117381489841986	Middle	0	8	9
467	bb190309-52	bb	156.4665	22	1	13	1.6	0.734	0	346	0.857252042230757	0.781038374717833	Middle	0	9	9
468	bb190309-52	bb	110.2995	13	1.6	376	247.85	0.567	11	412	0.604311284728881	0.930022573363431	Terminal	0	10	9
469	bb190309-52	bb	NA	376	247.85	9	0.6	0.534	11	NA	NA	NA	Initial	1	1	10
470	bb190309-52	bb	78.203	9	0.6	10	0.6	0.568	0	249	0.428460286761523	0.562076749435666	Middle	0	2	10
471	bb190309-52	bb	68.226	10	0.6	8	0.4	0.667	0	147	0.373798083508199	0.331828442437923	Middle	0	3	10
472	bb190309-52	bb	79.816	8	0.4	6	0.3	0.601	0	207	0.437297626026594	0.467268623024831	Middle	0	4	10
473	bb190309-52	bb	63.6245	6	0.3	8	0.4	0.567	0	174	0.34858728584656	0.392776523702032	Middle	0	5	10
474	bb190309-52	bb	63.1215	8	0.4	8	0.4	0.667	0	205	0.345831438574191	0.4627539503386	Middle	0	6	10
475	bb190309-52	bb	102.0105	8	0.4	14	NA	0.7	0	224	0.558897332361756	0.505643340857788	Middle	0	7	10
476	bb190309-52	bb	56.065	14	1.1	27	1.6	0.634	0	149	0.307170133847612	0.336343115124153	Middle	0	8	10
477	bb190309-52	bb	113.5575	27	1.6	19	1.2	0.7	0	220	0.622161285550704	0.496613995485327	Middle	0	9	10
478	bb190309-52	bb	30.122	19	1.2	26	1.6	0.434	0	161	0.165033064688447	0.363431151241535	Middle	0	10	10
479	bb190309-52	bb	50.9235	26	1.6	18	0.9	0.601	0	308	0.279000772513848	0.695259593679458	Middle	0	11	10
480	bb190309-52	bb	80.5825	18	0.9	20	NA	0.634	0	110	0.441497142794528	0.248306997742664	Middle	0	12	10
481	bb190309-52	bb	144.6375	20	NA	271	223	0.867	6	301	0.792443061346366	0.679458239277652	Terminal	0	13	10
482	bb190309-52	bb	30.401	271	223	13	1.1	0.818	6	149	0.166561655919045	0.336343115124153	Initial	1	1	11
483	bb190309-52	bb	6.5115	13	1.1	11	0.7	0.133	0	77	0.0356753469463788	0.173814898419865	Middle	0	2	11
484	bb190309-52	bb	23.9445	11	0.7	9	0.6	0.401	0	81	0.131187644161494	0.182844243792325	Middle	0	3	11
485	bb190309-52	bb	17.666	9	0.6	9	0.5	0.334	0	97	0.0967888626514209	0.218961625282167	Middle	0	4	11
486	bb190309-52	bb	30.162	9	0.5	11	0.6	0.467	0	98	0.165252217553049	0.221218961625282	Middle	0	5	11
487	bb190309-52	bb	30.58	11	0.6	18	NA	0.468	0	120	0.167542364988138	0.270880361173815	Middle	0	6	11
488	bb190309-52	bb	13.375	18	3.3	27	1.8	0.267	0	115	0.0732792391012541	0.259593679458239	Middle	0	7	11
489	bb190309-52	bb	12.359	27	1.8	31	2.2	0.333	0	59	0.0677127563403663	0.133182844243792	Middle	0	8	11
490	bb190309-52	bb	14.185	31	2.2	21	1.6	0.334	0	55	0.0777170846094422	0.124153498871332	Middle	0	9	11
491	bb190309-52	bb	5.1135	21	1.6	13	1.4	0.2	0	49	0.028015954328543	0.110609480812641	Middle	0	10	11
492	bb190309-52	bb	117.6005	13	1.4	349	228.8	0.668	9	NA	0.644312161340339	NA	Terminal	0	11	11
493	bb190309-52	bb	25.6505	349	228.8	12	0.8	0.401	9	124	0.140534513836764	0.279909706546275	Initial	1	1	12
494	bb190309-52	bb	19.124	12	0.8	9	0.6	0.334	0	93	0.10477698456616	0.209932279909707	Middle	0	2	12
495	bb190309-52	bb	59.231	9	0.6	9	0.6	0.601	0	102	0.324516083080851	0.230248306997743	Middle	0	3	12
496	bb190309-52	bb	28.455	9	0.6	9	0.6	0.4	0	183	0.155899869056163	0.413092550790068	Middle	0	4	12
497	bb190309-52	bb	58.0215	9	0.6	8	0.4	0.534	0	144	0.317889448337452	0.325056433408578	Middle	0	5	12
498	bb190309-52	bb	11.208	8	0.4	10	0.7	0.266	0	200	0.0614066326614472	0.451467268623025	Middle	0	6	12
499	bb190309-52	bb	26.8175	10	0.7	8	NA	0.468	0	63	0.146928298661524	0.142212189616253	Middle	0	7	12
500	bb190309-52	bb	41.551	8	2.1	32	2	0.534	0	92	0.227650516926819	0.207674943566591	Middle	0	8	12
501	bb190309-52	bb	66.764	32	2	19	1.4	0.667	0	119	0.365788046307	0.2686230248307	Middle	0	9	12
502	bb190309-52	bb	68.272	19	1.4	21	1.7	0.6	0	176	0.374050109302491	0.397291196388262	Middle	0	10	12
503	bb190309-52	bb	17.634	21	1.7	17	1.6	0.333	0	208	0.0966135403597394	0.469525959367946	Middle	0	11	12
504	bb190309-52	bb	60.7765	17	1.6	354	250.16	0.534	8	297	0.332983601886906	0.670428893905192	Terminal	0	12	12
505	bb190309-52	bb	14.0475	354	250.16	12	0.9	0.334	8	74	0.0769637466373732	0.167042889390519	Initial	1	1	13
506	bb190309-52	bb	52.3165	12	0.9	10	0.7	0.534	0	175	0.286632771023608	0.395033860045147	Middle	0	2	13
507	bb190309-52	bb	28.5285	10	0.7	11	0.8	0.467	0	78	0.156302562444869	0.17607223476298	Middle	0	3	13
508	bb190309-52	bb	36.552	11	0.8	11	0.8	0.601	0	142	0.200261887673199	0.320541760722348	Middle	0	4	13
509	bb190309-52	bb	27.076	11	0.8	6	0.7	0.467	0	110	0.148344574049014	0.248306997742664	Middle	0	5	13
510	bb190309-52	bb	37.0155	6	1.2	28	2.2	0.467	0	106	0.202801321491774	0.239277652370203	Middle	0	6	13
511	bb190309-52	bb	23.6905	28	2.2	41	1.5	0.334	0	98	0.129796023471272	0.221218961625282	Middle	0	7	13
512	bb190309-52	bb	31.822	41	1.5	47	2.5	0.434	0	160	0.174347061434027	0.36117381489842	Middle	0	8	13
513	bb190309-52	bb	29.239	47	2.5	31	1.5	0.401	0	202	0.16019526520236	0.455981941309255	Middle	0	9	13
514	bb190309-52	bb	21.716	31	1.5	24	1.4	0.4	0	115	0.118978090192361	0.259593679458239	Middle	0	10	13
515	bb190309-52	bb	19.6875	24	1.4	17	1	0.401	0	121	0.107864300546239	0.27313769751693	Middle	0	11	13
516	bb190309-52	bb	43.407	17	1	23	1.5	0.6	0	94	0.237819209844347	0.212189616252822	Middle	0	12	13
517	bb190309-52	bb	NA	23	1.5	11	0.8	0.133	0	NA	NA	NA	Middle	0	13	13
518	bb190309-52	bb	NA	11	0.8	283	252.2	NA	6	NA	NA	NA	Terminal	0	14	13
519	bb180304-45	bb	36.118	355	76.2	13	1.9	0.534	6	117	0.218132843735279	0.527027027027027	Initial	1	1	1
520	bb180304-45	bb	60.44	13	1.9	10	1.2	0.667	0	141	0.365024338982232	0.635135135135135	Middle	0	2	1
521	bb180304-45	bb	81.9445	10	1.2	13	1.6	0.734	0	156	0.494899684740726	0.702702702702703	Middle	0	3	1
522	bb180304-45	bb	71.197	13	1.6	9	1.2	0.734	0	133	0.429990699247485	0.599099099099099	Middle	0	4	1
523	bb180304-45	bb	165.578	9	1.2	15	2.2	0.734	0	117	1	0.527027027027027	Middle	0	5	1
524	bb180304-45	bb	79.5535	15	2.2	15	2.9	0.601	0	180	0.480459360543067	0.810810810810811	Middle	0	6	1
525	bb180304-45	bb	66.857	15	2.9	17	3.4	0.6	0	189	0.403779487613089	0.851351351351351	Middle	0	7	1
526	bb180304-45	bb	64.1755	17	3.4	15	2.7	0.601	0	158	0.387584703281837	0.711711711711712	Middle	0	8	1
527	bb180304-45	bb	106.503	15	2.7	42	12.2	0.868	0	185	0.643219509838263	0.833333333333333	Middle	0	9	1
528	bb180304-45	bb	111.568	42	12.2	248	80.4	0.867	1	216	0.673809322494534	0.972972972972973	Terminal	0	10	1
529	bb180304-45	bb	85.925	248	80.4	17	3.4	0.734	1	173	0.518939714213241	0.779279279279279	Initial	1	1	2
530	bb180304-45	bb	68.229	17	3.4	18	2.5	0.734	0	134	0.412065612581382	0.603603603603604	Middle	0	2	2
531	bb180304-45	bb	95.5165	18	2.5	73	6.6	0.801	0	168	0.576867095870224	0.756756756756757	Middle	0	3	2
532	bb180304-45	bb	63.455	73	6.6	30	4.8	0.667	0	157	0.383233279783546	0.707207207207207	Middle	0	4	2
533	bb180304-45	bb	95.0845	30	4.8	79	10.5	0.734	0	172	0.574258053606155	0.774774774774775	Middle	0	5	2
534	bb180304-45	bb	103.1295	79	10.5	22	2.9	0.868	0	166	0.622845426324753	0.747747747747748	Middle	0	6	2
535	bb180304-45	bb	81.243	22	2.9	20	3.8	0.867	0	135	0.490663010786457	0.608108108108108	Middle	0	7	2
536	bb180304-45	bb	131.2515	20	3.8	240	103.3	0.867	8	222	0.792686830376016	1	Terminal	0	8	2
537	bb180304-45	bb	18.7675	240	178.3	14	2.9	0.4	8	75	0.113345371969706	0.337837837837838	Initial	1	1	3
538	bb180304-45	bb	25.841	14	2.9	22	6	0.333	0	129	0.156065419318992	0.581081081081081	Middle	0	2	3
539	bb180304-45	bb	NA	22	6	15	2.2	0.801	0	142	NA	0.63963963963964	Middle	0	3	3
540	bb180304-45	bb	7.705	15	2.2	13	1.9	0.267	0	150	0.0465339598255807	0.675675675675676	Middle	0	4	3
541	bb180304-45	bb	103.8345	13	1.9	18	3.7	0.734	0	151	0.627103238352921	0.68018018018018	Middle	0	5	3
542	bb180304-45	bb	88.3695	18	3.7	22	3.6	0.534	0	NA	0.533703148969066	NA	Middle	0	6	3
543	bb180304-45	bb	39.0875	22	3.6	36	7	0.6	0	108	0.23606698957591	0.486486486486487	Middle	0	7	3
544	bb180304-45	bb	16.36	36	7	130	12	0.333	0	135	0.0988053968522388	0.608108108108108	Terminal	0	8	3
545	bb180304-45	bb	NA	130	12	31	3.6	0.734	0	NA	NA	NA	Initial	1	1	4
546	bb180304-45	bb	52.583	31	3.6	31	4.2	0.667	0	51	0.317572382804479	0.22972972972973	Middle	0	2	4
547	bb180304-45	bb	43.9665	31	4.2	33	6	0.6	0	126	0.265533464590707	0.567567567567568	Middle	0	3	4
548	bb180304-45	bb	78.518	33	6	50	8.9	0.734	0	96	0.474205510393893	0.432432432432432	Middle	0	4	4
549	bb180304-45	bb	45.909	50	8.9	43	8.6	0.534	0	97	0.277265095604489	0.436936936936937	Middle	0	5	4
550	bb180304-45	bb	NA	43	8.6	21	2.7	0.934	0	94	NA	0.423423423423423	Middle	0	6	4
551	bb180304-45	bb	32.7665	21	2.7	27	2.7	0.534	0	NA	0.197891628114846	NA	Middle	0	7	4
552	bb180304-45	bb	58.8925	27	2.7	14	1.7	0.667	0	114	0.355678290594161	0.513513513513513	Middle	0	8	4
553	bb180304-45	bb	132.3085	14	1.7	354	179.5	1.001	10	197	0.799070528693426	0.887387387387387	Terminal	0	9	4
554	bb180304-45	bb	12.6515	354	179.5	32	5.2	0.267	10	82	0.0764080976941381	0.369369369369369	Initial	1	1	5
555	bb180304-45	bb	48.5535	32	5.2	17	2.7	0.533	0	144	0.293236420297383	0.648648648648649	Middle	0	2	5
556	bb180304-45	bb	19.3235	17	2.7	22	4.3	0.467	0	74	0.116703305994758	0.333333333333333	Middle	0	3	5
557	bb180304-45	bb	21.726	22	4.3	16	2.4	0.401	0	87	0.131213083863798	0.391891891891892	Middle	0	4	5
558	bb180304-45	bb	41.5485	16	2.4	15	2.3	0.6	0	122	0.250930075251543	0.54954954954955	Middle	0	5	5
559	bb180304-45	bb	77.2885	15	2.3	171	11.1	0.734	0	206	0.466780007005762	0.927927927927928	Terminal	0	6	5
560	bb180304-45	bb	3.662	171	11.1	20	3.8	0.2	0	36	0.0221164647477322	0.162162162162162	Initial	1	1	6
561	bb180304-45	bb	13.096	20	3.8	16	2	0.334	0	80	0.0790926330792738	0.36036036036036	Middle	0	2	6
562	bb180304-45	bb	65.8085	16	2	21	3.2	0.668	0	162	0.397447124618005	0.72972972972973	Middle	0	3	6
563	bb180304-45	bb	53.7865	21	3.2	87	12.9	0.667	0	130	0.324840860500791	0.585585585585586	Middle	0	4	6
564	bb180304-45	bb	NA	87	12.9	15	1.5	0.266	0	NA	NA	NA	Middle	0	5	6
565	bb180304-45	bb	NA	15	1.5	17	2	0.133	0	NA	NA	NA	Middle	0	6	6
566	bb180304-45	bb	20.035	17	2	15	1.5	0.4	0	93	0.12100037444588	0.418918918918919	Middle	0	7	6
567	bb180304-45	bb	133.248	15	1.5	380	177.87	1.001	6	208	0.804744591672807	0.936936936936937	Terminal	0	8	6
568	bb180304-45	bb	38.6515	380	177.87	28	5.7	0.433	6	152	0.2334337895131	0.684684684684685	Initial	1	1	7
569	bb180304-45	bb	6.471	28	5.7	16	3.8	0.233	0	46	0.0390812789138654	0.207207207207207	Middle	0	2	7
570	bb180304-45	bb	8.2355	16	3.8	13	2	0.267	0	84	0.049737887883656	0.378378378378378	Middle	0	3	7
571	bb180304-45	bb	23.2375	13	2	20	4.5	0.4	0	119	0.140341712063197	0.536036036036036	Middle	0	4	7
572	bb180304-45	bb	21.774	20	4.5	36	6.4	0.367	0	NA	0.131502977448695	NA	Middle	0	5	7
573	bb180304-45	bb	21.9505	36	6.4	20	3.3	0.367	0	54	0.132568940318158	0.243243243243243	Middle	0	6	7
574	bb180304-45	bb	27.0775	20	3.3	21	3.8	0.367	0	101	0.16353319885492	0.454954954954955	Middle	0	7	7
575	bb180304-45	bb	32.594	21	3.8	20	3	0.4	0	119	0.196849823044124	0.536036036036036	Middle	0	8	7
576	bb180304-45	bb	30.895	20	3	77	8.4	0.433	0	91	0.186588798028724	0.40990990990991	Middle	0	9	7
577	bb180304-45	bb	NA	77	8.4	14	5.3	0.334	0	150	NA	0.675675675675676	Middle	0	10	7
578	bb180304-45	bb	18.589	14	5.3	26	4	0.401	0	151	0.112267330200872	0.68018018018018	Middle	0	11	7
579	bb180304-45	bb	27.606	26	4	41	6	0.434	0	117	0.166725048013625	0.527027027027027	Middle	0	12	7
580	bb180304-45	bb	NA	41	6	35	2.4	0.567	0	NA	NA	NA	Middle	0	13	7
581	bb180304-45	bb	38.86	35	2.4	313	39	0.467	0	147	0.234693014772494	0.662162162162162	Terminal	0	14	7
582	bb180304-45	bb	NA	90	37.8	22	8.1	0.401	0	NA	NA	NA	Middle	0	15	7
583	bb180304-45	bb	43.9885	18	8.1	152	30.4	0.5	0	147	0.265666332483784	0.662162162162162	Terminal	0	16	7
584	bb180304-45	bb	NA	152	30.4	33	NA	0.4	0	NA	NA	NA	Initial	1	1	8
585	bb180304-45	bb	NA	35	NA	142	NA	0.734	0	NA	NA	NA	Terminal	0	2	8
586	bb190224-52	bb	42.3825	84	24.2	5	0.7	0.534	5	114	0.798366816422254	0.754966887417219	Middle	0	3	8
587	bb190224-52	bb	14.832	5	0.7	40	22.6	0.267	2	111	0.279393066033737	0.735099337748344	Middle	0	4	8
588	bb190224-52	bb	24.9735	40	22.6	8	0.8	0.333	2	128	0.470430335396005	0.847682119205298	Middle	0	5	8
589	bb190224-52	bb	13.9695	8	0.8	16	1.2	0.267	0	84	0.263145997570004	0.556291390728477	Middle	0	6	8
590	bb190224-52	bb	18.6745	16	1.2	14	0.5	0.333	0	96	0.351774933363473	0.635761589403974	Middle	0	7	8
591	bb190224-52	bb	53.0865	14	0.5	63	27.2	0.6	3	122	1	0.80794701986755	Middle	0	8	8
592	bb190224-52	bb	43.901	50	20.1	10	2.3	0.467	3	137	0.826971075508839	0.907284768211921	Middle	0	9	8
593	bb190224-52	bb	20.836	10	2.3	48	22.3	0.3	3	114	0.392491499722152	0.754966887417219	Middle	0	10	8
594	bb190224-52	bb	1.905	48	22.3	8	0.9	0.1	3	36	0.0358848294764206	0.23841059602649	Middle	0	11	8
595	bb190224-52	bb	20.9995	8	0.9	42	36.1	0.3	2	109	0.395571378787451	0.721854304635762	Middle	0	12	8
596	bb190224-52	bb	40.39	42	36.1	4	0.4	0.467	2	138	0.760833733623426	0.913907284768212	Middle	0	13	8
597	bb190224-52	bb	49.897	4	0.4	55	23.8	0.534	3	131	0.939918811750633	0.867549668874172	Middle	0	14	8
598	bb190224-52	bb	8.611	37	16.8	4	0	0.233	2	58	0.162206964105752	0.384105960264901	Middle	0	15	8
599	bb190224-52	bb	37.3315	4	0	35	21.1	0.5	1	100	0.703220216062464	0.662251655629139	Middle	0	16	8
600	bb190224-52	bb	NA	34	15.7	8	1.3	NA	2	NA	NA	NA	Middle	0	17	8
601	bb190224-52	bb	NA	8	1.3	35	17.3	NA	2	NA	NA	NA	Middle	0	18	8
602	bb190224-52	bb	NA	35	17.3	9	1.3	NA	2	NA	NA	NA	Middle	0	19	8
603	bb190224-52	bb	NA	9	1.3	51	17.8	NA	3	NA	NA	NA	Middle	0	20	8
604	bb190224-52	bb	NA	51	17.8	13	1.3	0.267	3	NA	NA	NA	Middle	0	21	8
605	bb190224-52	bb	28.259	13	1.3	5	0	0.501	0	86	0.532319893004813	0.56953642384106	Middle	0	22	8
606	bb190224-52	bb	26.8935	5	0	19	0.3	0.467	0	77	0.506597722584838	0.509933774834437	Middle	0	23	8
607	bb190224-52	bb	NA	19	0.3	5	0.2	0.601	0	NA	NA	NA	Middle	0	24	8
608	bb190224-52	bb	29.278	5	0.2	9	0.1	0.434	0	100	0.551514980268053	0.662251655629139	Middle	0	25	8
609	bb190224-52	bb	NA	9	0.1	22	2.3	0.734	0	NA	NA	NA	Middle	0	26	8
610	bb190224-52	bb	43.941	22	2.3	52	18.5	0.567	3	124	0.82772456274194	0.821192052980132	Middle	0	27	8
611	bb190224-52	bb	11.2265	52	18.5	9	0.7	0.201	3	90	0.211475610560124	0.596026490066225	Middle	0	28	8
612	bb190224-52	bb	40.31	9	0.7	66	22.7	0.601	4	86	0.759326759157225	0.56953642384106	Middle	0	29	8
613	bb190224-52	bb	NA	66	22.7	11	1.4	0.267	4	NA	NA	NA	Middle	0	30	8
614	bb190224-52	bb	NA	11	1.4	55	23	0.233	2	NA	NA	NA	Middle	0	31	8
615	bb190224-52	bb	NA	55	23	13	2.4	0.267	0	NA	NA	NA	Middle	0	32	8
616	bb190224-52	bb	NA	13	2.4	18	3.6	0.401	0	NA	NA	NA	Middle	0	33	8
617	bb190224-52	bb	NA	18	3.6	56	4.5	0.4	0	NA	NA	NA	Middle	0	34	8
618	bb190224-52	bb	NA	56	4.5	101	2.4	0.333	0	NA	NA	NA	Terminal	0	35	8
619	bb190224-52	bb	NA	101	2.4	13	1.4	0.567	0	87	NA	0.576158940397351	Initial	1	1	1
620	bb190224-52	bb	33.414	13	1.4	50	3.1	0.3	0	65	0.629425560170665	0.43046357615894	Middle	0	2	1
621	bb190224-52	bb	7.1595	50	3.1	40	2.4	0.267	0	69	0.13486479613461	0.456953642384106	Middle	0	3	1
622	bb190224-52	bb	11.4565	40	2.4	5	0.2	0.501	0	71	0.215808162150453	0.470198675496689	Middle	0	4	1
623	bb190224-52	bb	17.0465	5	0.2	14	0.8	0.2	0	48	0.321108002976275	0.317880794701987	Middle	0	5	1
624	bb190224-52	bb	6.344	14	0.8	10	0.7	0.466	0	NA	0.11950307516977	NA	Middle	0	6	1
625	bb190224-52	bb	35.9605	10	0.7	135	48.9	0.567	1	93	0.677394441147938	0.615894039735099	Terminal	0	7	1
626	bb190224-52	bb	NA	80	15.3	9	0.6	0.334	2	NA	NA	NA	Middle	0	8	1
627	bb190224-52	bb	NA	9	0.6	10	0.3	0.133	0	NA	NA	NA	Middle	0	9	1
628	bb190224-52	bb	NA	10	0.3	15	0.7	0.467	0	NA	NA	NA	Middle	0	10	1
629	bb190224-52	bb	23.544	15	0.7	6	0.2	0.367	0	85	0.443502585403069	0.562913907284768	Middle	0	11	1
630	bb190224-52	bb	NA	6	0.2	20	2.1	0.334	0	NA	NA	NA	Middle	0	12	1
631	bb190224-52	bb	NA	20	2.1	95	22.05	0.467	4	NA	NA	NA	Terminal	0	13	1
632	bb190224-52	bb	3.292	70	29.2	12	1.8	0.134	2	42	0.0620119992841871	0.278145695364238	Middle	0	14	1
633	bb190224-52	bb	12.4705	12	1.8	9	1.2	0.3	0	69	0.234909063509555	0.456953642384106	Middle	0	15	1
634	bb190224-52	bb	7.236	9	1.2	11	1.7	0.234	0	54	0.136305840467916	0.357615894039735	Middle	0	16	1
635	bb190224-52	bb	28.4015	11	1.7	113	60.8	0.434	0	101	0.535004191272734	0.66887417218543	Terminal	0	17	1
636	bb190224-52	bb	48.1345	113	60.8	13	1	0.534	0	126	0.906718280542134	0.834437086092715	Initial	1	1	2
637	bb190224-52	bb	NA	13	1	12	2.4	0.334	0	NA	NA	NA	Middle	0	2	2
638	bb190224-52	bb	34.098	12	2.4	137	33.4	0.434	2	117	0.642310191856687	0.774834437086093	Terminal	0	3	2
639	bb190224-52	bb	14.364	137	33.4	14	2.6	0.234	2	91	0.270577265406459	0.602649006622517	Initial	1	1	3
640	bb190224-52	bb	34.463	14	2.6	63	14.8	0.401	0	119	0.649185762858731	0.788079470198676	Middle	0	2	3
641	bb190224-52	bb	27.393	63	14.8	132	69.2	0.4	0	106	0.516006894408183	0.701986754966887	Terminal	0	3	3
642	bb190224-52	bb	25.9105	132	69.2	13	2.4	0.434	0	99	0.488080773831388	0.655629139072848	Initial	1	1	4
643	bb190224-52	bb	34.5855	13	2.4	162	89.5	0.533	2	99	0.651493317510102	0.655629139072848	Terminal	0	2	4
644	bb190224-52	bb	10.6895	162	89.5	10	1.1	0.334	2	59	0.201360044455747	0.390728476821192	Initial	1	1	5
645	bb190224-52	bb	NA	10	1.1	5	0.3	0.267	0	NA	NA	NA	Middle	0	2	5
646	bb190224-52	bb	NA	5	0.3	10	0.9	0.2	0	NA	NA	NA	Middle	0	3	5
647	bb190224-52	bb	35.45	10	0.9	51	14.9	0.4	2	143	0.66777806033549	0.947019867549669	Middle	0	4	5
648	bb190224-52	bb	NA	51	18.3	10	1.5	0.333	2	NA	NA	NA	Middle	0	5	5
649	bb190224-52	bb	10.8575	10	1.5	7	1	0.267	0	62	0.20452469083477	0.410596026490066	Middle	0	6	5
650	bb190224-52	bb	15.7325	7	1	111	34.5	0.267	0	87	0.296355947368917	0.576158940397351	Terminal	0	7	5
651	bb190224-52	bb	10.4935	111	34.5	13	1.4	0.233	0	66	0.197667957013553	0.437086092715232	Initial	1	1	6
652	bb190224-52	bb	NA	13	1.4	152	58.7	0.3	6	NA	NA	NA	Terminal	0	2	6
653	bb190224-52	bb	NA	152	58.7	10	2	0.2	6	NA	NA	NA	Initial	1	1	7
654	bb190224-52	bb	16.9535	10	2	11	2.4	0.267	0	76	0.319356145159315	0.503311258278146	Middle	0	2	7
655	bb190224-52	bb	33.435	11	2.4	13	2.1	0.334	0	79	0.629821140968043	0.52317880794702	Middle	0	3	7
656	bb190224-52	bb	NA	13	2.1	140	58.7	0.434	2	100	NA	0.662251655629139	Terminal	0	4	7
657	bb190224-52	bb	NA	140	58.7	15	1.4	NA	2	NA	NA	NA	Initial	1	1	8
658	bb190224-52	bb	NA	15	1.4	7	0.7	NA	0	NA	NA	NA	Middle	0	2	8
659	bb190224-52	bb	31.1285	7	0.7	12	2.2	NA	0	NA	0.586373183389374	NA	Middle	0	3	8
660	bb190224-52	bb	NA	12	2.2	9	1	0.534	0	81	NA	0.536423841059603	Middle	0	4	8
661	bb190224-52	bb	NA	9	1	8	1.5	NA	0	NA	NA	NA	Middle	0	5	8
662	bb190224-52	bb	29.8955	8	1.5	9	1.5	NA	0	NA	0.563146939429045	NA	Middle	0	6	8
663	bb190224-52	bb	NA	9	1.5	129	62.3	0.367	3	110	NA	0.728476821192053	Terminal	0	7	8
664	bb190224-52	bb	NA	129	62.3	9	2	NA	3	NA	NA	NA	Initial	1	1	9
665	bb190224-52	bb	NA	9	2	8	1.1	NA	0	NA	NA	NA	Middle	0	2	9
666	bb190224-52	bb	15.235	8	1.1	6	1	NA	0	NA	0.286984449907227	NA	Middle	0	3	9
667	bb190224-52	bb	2.1775	6	1	98	48.8	0.334	5	85	0.041017961251919	0.562913907284768	Terminal	0	4	9
668	bb190224-52	bb	NA	98	48.8	8	1.3	0.134	5	33	NA	0.218543046357616	Initial	1	1	10
669	bb190224-52	bb	22.3405	8	1.3	10	1.2	0.334	0	NA	0.420832038277151	NA	Middle	0	2	10
670	bb190224-52	bb	9.808	10	1.2	6	0.9	0.468	0	75	0.18475506955629	0.496688741721854	Middle	0	3	10
671	bb190224-52	bb	NA	6	0.9	134	61.2	0.233	6	86	NA	0.56953642384106	Terminal	0	4	10
672	bb190224-52	bb	NA	134	61.2	11	1.3	0.267	6	NA	NA	NA	Initial	1	1	11
673	bb190224-52	bb	2.299	11	1.3	8	0.7	0.2	0	NA	0.0433066787224624	NA	Middle	0	2	11
674	bb190224-52	bb	NA	8	0.7	9	1.2	0.2	0	25	NA	0.165562913907285	Middle	0	3	11
675	bb190224-52	bb	3.6885	9	1.2	8	0.6	0.333	0	NA	0.0694809414822978	NA	Middle	0	4	11
676	bb190224-52	bb	NA	8	0.6	10	1.8	0.2	0	36	NA	0.23841059602649	Middle	0	5	11
677	bb190224-52	bb	37.6535	10	1.8	8	0.7	0.201	0	NA	0.709285788288925	NA	Middle	0	6	11
678	bb190224-52	bb	NA	8	0.7	116	58.7	0.468	5	151	NA	1	Terminal	0	7	11
679	bb190224-52	bb	NA	116	58.7	11	1.6	NA	5	NA	NA	NA	Initial	1	1	12
680	bb190224-52	bb	NA	11	1.6	11	1.6	NA	0	NA	NA	NA	Middle	0	2	12
681	bb190224-52	bb	NA	11	1.6	14	3.3	0.2	0	NA	NA	NA	Middle	0	3	12
682	bb190224-52	bb	NA	14	3.3	12	1.8	NA	0	NA	NA	NA	Middle	0	4	12
683	bb190224-52	bb	12.13	12	1.8	9	1.3	NA	0	NA	0.228495003437786	NA	Middle	0	5	12
684	bb190224-52	bb	NA	9	1.3	131	60.7	0.333	6	84	NA	0.556291390728477	Terminal	0	6	12
685	bb190224-52	bb	NA	131	60.7	10	1.7	NA	6	NA	NA	NA	Initial	1	1	13
686	bb190224-52	bb	NA	10	1.7	5	1	NA	0	NA	NA	NA	Middle	0	2	13
687	bb190224-52	bb	19.0245	5	1	8	1.3	NA	0	NA	0.358367946653104	NA	Middle	0	3	13
688	bb190224-52	bb	6.534	8	1.3	29	7.4	NA	0	79	0.123082139526998	0.52317880794702	Middle	0	4	13
689	bb190224-52	bb	23.0525	29	7.4	111	43.2	0.2	2	82	0.434244111026344	0.543046357615894	Terminal	0	5	13
690	bb190224-52	bb	NA	111	43.2	11	2.5	0.4	2	97	NA	0.642384105960265	Initial	1	1	14
691	bb190224-52	bb	16.0785	11	2.5	11	1.8	0.267	0	NA	0.302873611935238	NA	Middle	0	2	14
692	bb190224-52	bb	NA	11	1.8	123	38.5	0.266	5	90	NA	0.596026490066225	Terminal	0	3	14
693	bb190224-52	bb	NA	123	38.5	9	1.3	NA	5	NA	NA	NA	Initial	1	1	15
694	bb190224-52	bb	NA	9	1.3	6	0.8	NA	0	NA	NA	NA	Middle	0	2	15
695	bb190224-52	bb	41.7955	6	0.8	7	1	NA	0	NA	0.787309391276501	NA	Middle	0	3	15
696	bb190224-52	bb	NA	7	1	96	29.5	0.667	5	95	NA	0.629139072847682	Terminal	0	4	15
697	bb190224-52	bb	30.3255	96	29.5	9	0.5	0.467	5	NA	0.571246927184878	NA	Initial	1	1	16
698	bb190224-52	bb	18.192	9	0.5	9	1.4	0.534	0	114	0.342685993614196	0.754966887417219	Middle	0	2	16
699	bb190224-52	bb	5.313	9	1.4	9	1.5	0.334	0	80	0.1000819417366	0.529801324503311	Middle	0	3	16
700	bb190224-52	bb	6.165	9	1.5	7	0.9	0.133	0	81	0.116131219801644	0.536423841059603	Middle	0	4	16
701	bb190224-52	bb	NA	7	0.9	77	29	0.2	5	71	NA	0.470198675496689	Middle	0	5	16
702	bb190224-52	bb	1.832	77	29	7	1	0.267	5	NA	0.0345097152760118	NA	Middle	0	6	16
703	bb190224-52	bb	21.7845	7	1	3	0	0.167	0	20	0.410358565737052	0.132450331125828	Middle	0	7	16
704	bb190224-52	bb	19.2495	3	0	4	0.4	0.501	0	86	0.362606312339295	0.56953642384106	Middle	0	8	16
705	bb190224-52	bb	11.066	4	0.4	75	27.9	0.3	4	107	0.208452243037307	0.708609271523179	Middle	0	9	16
706	bb190224-52	bb	9.242	75	27.9	12	2.7	0.201	4	89	0.174093225207915	0.589403973509934	Middle	0	10	16
707	bb190224-52	bb	NA	12	2.7	69	26.2	0.2	4	94	NA	0.622516556291391	Middle	0	11	16
708	bb190224-52	bb	1.319	69	26.2	6	0.8	0.133	4	NA	0.0248462415114954	NA	Middle	0	12	16
709	bb190224-52	bb	3.348	6	0.8	8	1.7	0.133	0	19	0.0630668814105281	0.125827814569536	Middle	0	13	16
710	bb190224-52	bb	NA	8	1.7	57	17	0.167	3	40	NA	0.264900662251656	Middle	0	14	16
711	bb190224-52	bb	10.606	57	17	12	1.6	0.2	3	NA	0.199787139856649	NA	Middle	0	15	16
712	bb190224-52	bb	10.9115	12	1.6	58	15.3	0.234	3	89	0.205541898599456	0.589403973509934	Middle	0	16	16
713	bb190224-52	bb	6.176	58	15.3	13	2.1	0.2	3	87	0.116338428790747	0.576158940397351	Middle	0	17	16
714	bb190224-52	bb	NA	13	2.1	50	13.8	0.2	3	57	NA	0.377483443708609	Middle	0	18	16
715	bb190224-52	bb	NA	50	13.8	42	2	0.133	3	NA	NA	NA	Middle	0	19	16
716	bb190224-52	bb	NA	42	2	47	16.3	0.334	2	NA	NA	NA	Middle	0	20	16
717	bb190224-52	bb	30.262	47	15.4	11	1.9	NA	3	NA	0.57005076620233	NA	Middle	0	21	16
718	bb190224-52	bb	NA	11	1.9	13	3.6	0.434	0	118	NA	0.781456953642384	Middle	0	22	16
719	bb190224-52	bb	NA	13	3.6	67	30.1	NA	4	NA	NA	NA	Middle	0	23	16
720	bb190224-52	bb	NA	67	30.1	4	0.5	0.2	4	NA	NA	NA	Middle	0	24	16
721	bb190224-52	bb	NA	4	0.5	7	0.9	0.2	0	NA	NA	NA	Middle	0	25	16
722	bb190224-52	bb	3.012	7	0.9	9	1.1	0.133	0	NA	0.0567375886524823	NA	Middle	0	26	16
723	bb190224-52	bb	2.3045	9	1.1	84	24.2	0.2	5	27	0.0434102832170137	0.178807947019868	Middle	0	27	16
724	bb190224-52	bb	NA	84	24.2	11	1.8	0.133	5	34	NA	0.225165562913907	Middle	0	28	16
725	bb190224-52	bb	NA	11	1.8	41	2.4	0.2	2	NA	NA	NA	Middle	0	29	16
726	bb190224-52	bb	NA	41	2.4	50	11.9	0.201	4	NA	NA	NA	Middle	0	30	16
727	bb190224-52	bb	NA	50	9.2	12	2.1	NA	4	NA	NA	NA	Middle	0	31	16
728	bb190224-52	bb	8.124	12	2.1	22	3.5	NA	0	NA	0.153033257042751	NA	Middle	0	32	16
729	bb190224-52	bb	NA	22	3.5	26	5.2	0.267	0	55	NA	0.364238410596026	Middle	0	33	16
730	bb190224-52	bb	NA	26	5.2	34	3.7	NA	1	NA	NA	NA	Middle	0	34	16
731	bb190224-52	bb	NA	34	3.7	28	4.3	NA	1	NA	NA	NA	Middle	0	35	16
732	bb190224-52	bb	NA	28	4.3	93	NA	NA	6	NA	NA	NA	Terminal	0	36	16
